# Supplementary material for: Synthesis of Bis(Carboranyl)amides 1,1′-μ-(CH2NH(O)C(CH2)n-1,2-C2B10H11)2 (n = 0, 1) and Attempt of Synthesis of Gadolinium Bis(Dicarbollide)
Source: MDPI journal article supplement (doi:10.3390/molecules26051321), 2021-03-02
Supplement: s1 [file s1]

## SUPPORTING INFORMATION

### Synthesis of Bis(Carboranyl)amides 1,1'- $\mu$ -(CH<sub>2</sub>NH(O)C(CH<sub>2</sub>)<sub>n</sub>-1,2-C<sub>2</sub>B<sub>10</sub>H<sub>11</sub>)<sub>2</sub> (n = 0, 1) and Attempt of Synthesis of Gadolinium Bis(Dicarbollide)

Yasunobu Asawa <sup>1</sup>, Aleksandra V. Arsent'eva <sup>2,3</sup>, Sergey A. Anufriev <sup>2</sup>, Alexei A. Anisimov <sup>2,4</sup>, Kyrill Yu. Suponitsky <sup>2,5</sup>, Oleg A. Filippov <sup>2,6</sup>, Hiroyuki Nakamura <sup>7</sup> and Igor B. Sivaev <sup>2,8\*</sup>

<sup>1</sup> School of Life Science and Technology, Tokyo Institute of Technology, Yokohama, 226-8501, Japan; [asawa.y.aa@m.titech.ac.jp](mailto:asawa.y.aa@m.titech.ac.jp) (Y.A.)

<sup>2</sup> A.N. Nesmeyanov Institute of Organoelement Compounds, Russian Academy of Sciences, 28 Vavilov Str., 119991 Moscow, Russia; [lappysya@mail.ru](mailto:lappysya@mail.ru) (A.V.A.); [trueman476@mail.ru](mailto:trueman476@mail.ru) (S.A.A.); [anisimov.alex.a@gmail.com](mailto:anisimov.alex.a@gmail.com) (A.A.A.); [kirshik@yahoo.com](mailto:kirshik@yahoo.com) (K.Y.S.); [h-bond@ineos.ac.ru](mailto:h-bond@ineos.ac.ru) (O.A.F.); [sivaev@ineos.ac.ru](mailto:sivaev@ineos.ac.ru) (I.B.S.)

<sup>3</sup> Faculty of Chemical Pharmaceutical Technologies and Biomedical Products, D.I. Mendeleev Russian Chemical Technological University, 9 Miusskaya Sq., 125047 Moscow, Russia;

<sup>4</sup> Higher Chemical College at the Russian Academy of Sciences, D.I. Mendeleev Russian Chemical Technological University, 9 Miusskaya Sq., 125047 Moscow, Russia;

<sup>5</sup> N.S. Kurnakov Institute of General and Inorganic Chemistry, Russian Academy of Sciences, 31 Leninsky Prosp., 119991, Moscow, Russia;

<sup>6</sup> Shemyakin-Ovchinnikov Institute of Bioorganic Chemistry, Russian Academy of Sciences, 16/10 Miklukho- Maklay Str., 117997, Moscow, Russia;

<sup>7</sup> Laboratory for Chemistry and Life Science, Institute of Innovative Research, Tokyo Institute of Technology, Yokohama, Kanagawa 226-8503, Japan; [hiro@res.titech.ac.jp](mailto:hiro@res.titech.ac.jp) (H.N.)

<sup>8</sup> Basic Department of Chemistry of Innovative Materials and Technologies, G.V. Plekhanov Russian University of Economics, 36 Stremyanniy Line, 117997 Moscow, Russia

\* Correspondence: [sivaev@ineos.ac.ru](mailto:sivaev@ineos.ac.ru)

|                                                                                                                        |    |
|------------------------------------------------------------------------------------------------------------------------|----|
| NMR spectra of compound <b>3</b>                                                                                       | 2  |
| NMR spectra of compound <b>4</b>                                                                                       | 5  |
| NMR spectra of compound <b>6</b>                                                                                       | 10 |
| NMR spectra of compound <b>7</b>                                                                                       | 13 |
| NMR spectra of compound (Me <sub>3</sub> NH) <sub>2</sub> [ <b>8</b> ]                                                 | 18 |
| NMR spectra of compound (Me <sub>3</sub> NH) <sub>2</sub> [ <b>9</b> ]                                                 | 23 |
| NMR spectra of compound Cs <sub>2</sub> [ <b>9</b> ]                                                                   | 26 |
| Geometry characteristics of compound <b>4</b>                                                                          | 29 |
| Geometry and energies of [Gd(C <sub>2</sub> B <sub>9</sub> H <sub>11</sub> ) <sub>2</sub> (DME)] <sup>-</sup> rotamers | 30 |

$^1\text{H}$  NMR, Compound 3

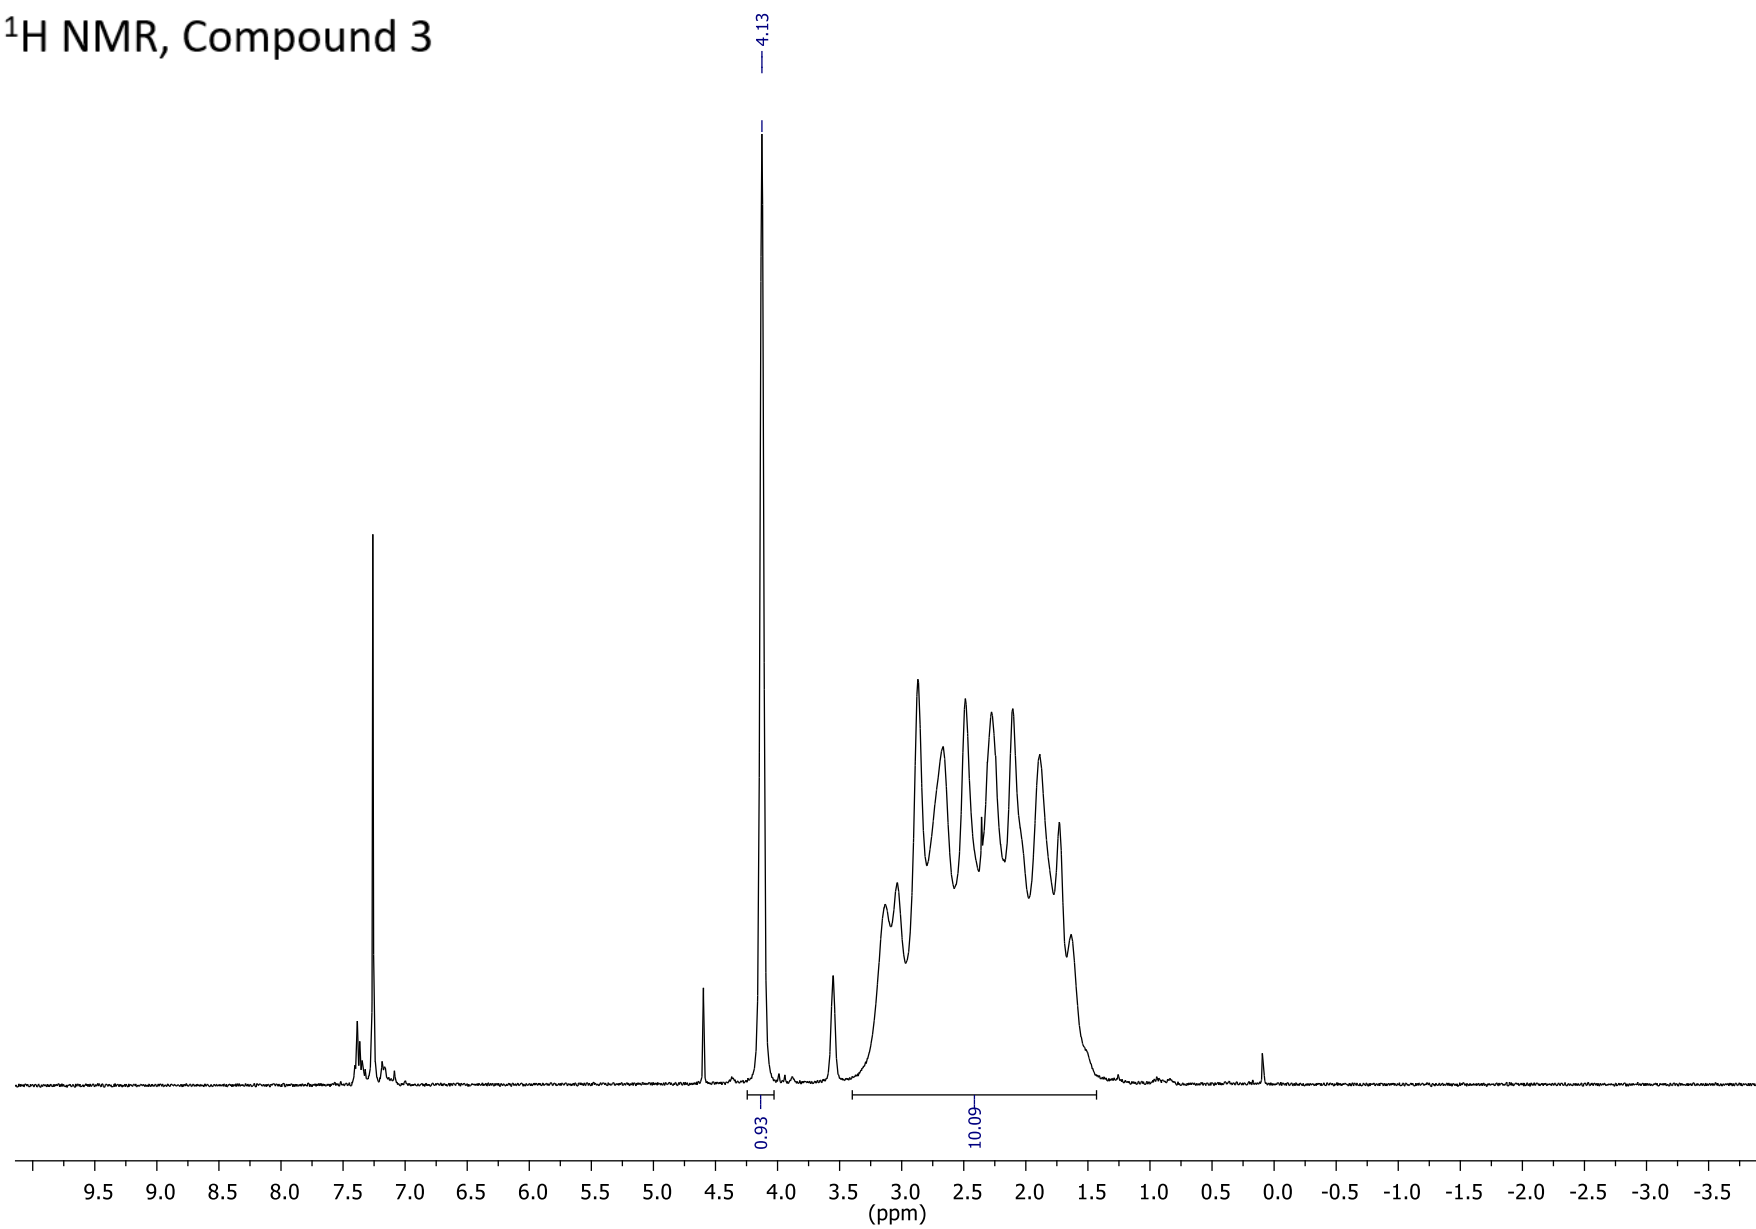

$^{11}\text{B}\{^1\text{H}\}$  NMR, Compound 3

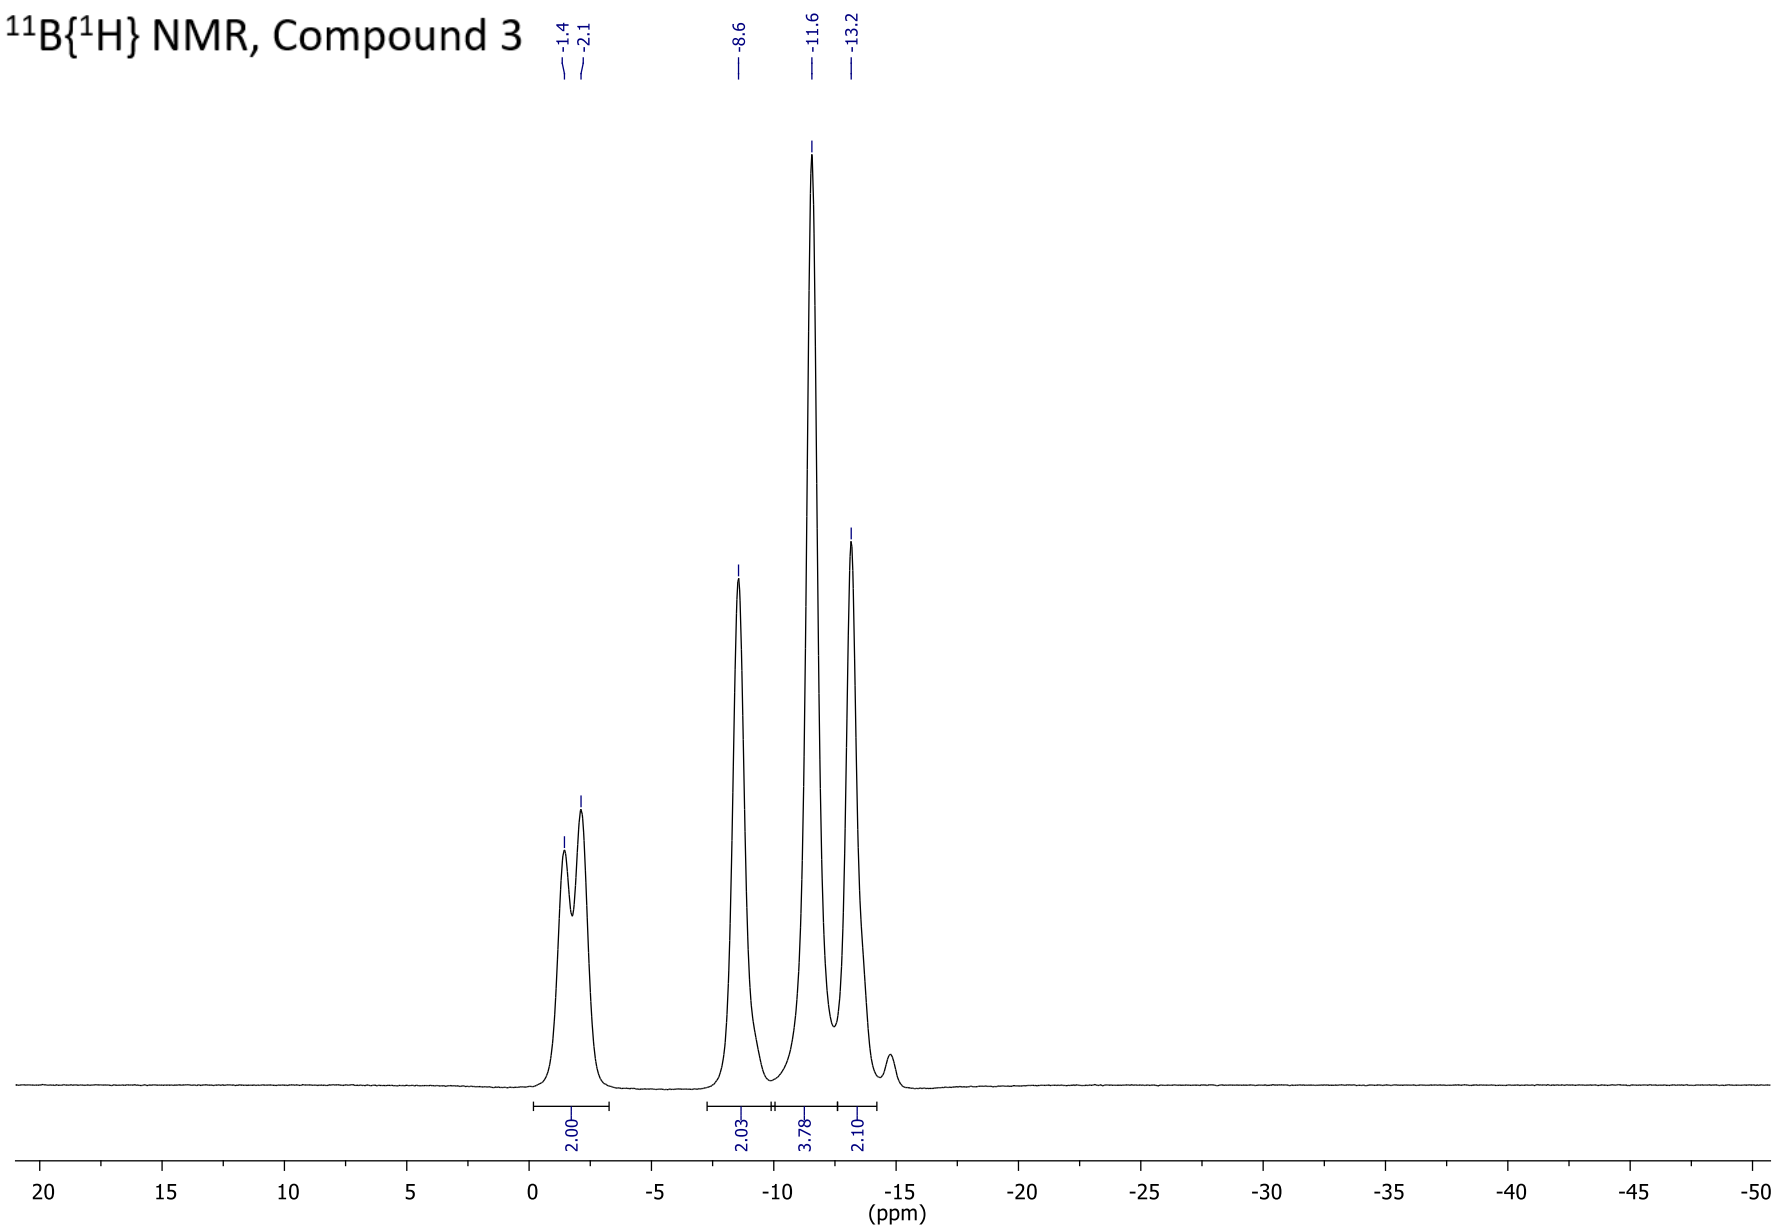

$^{11}\text{B}$  NMR, Compound 3

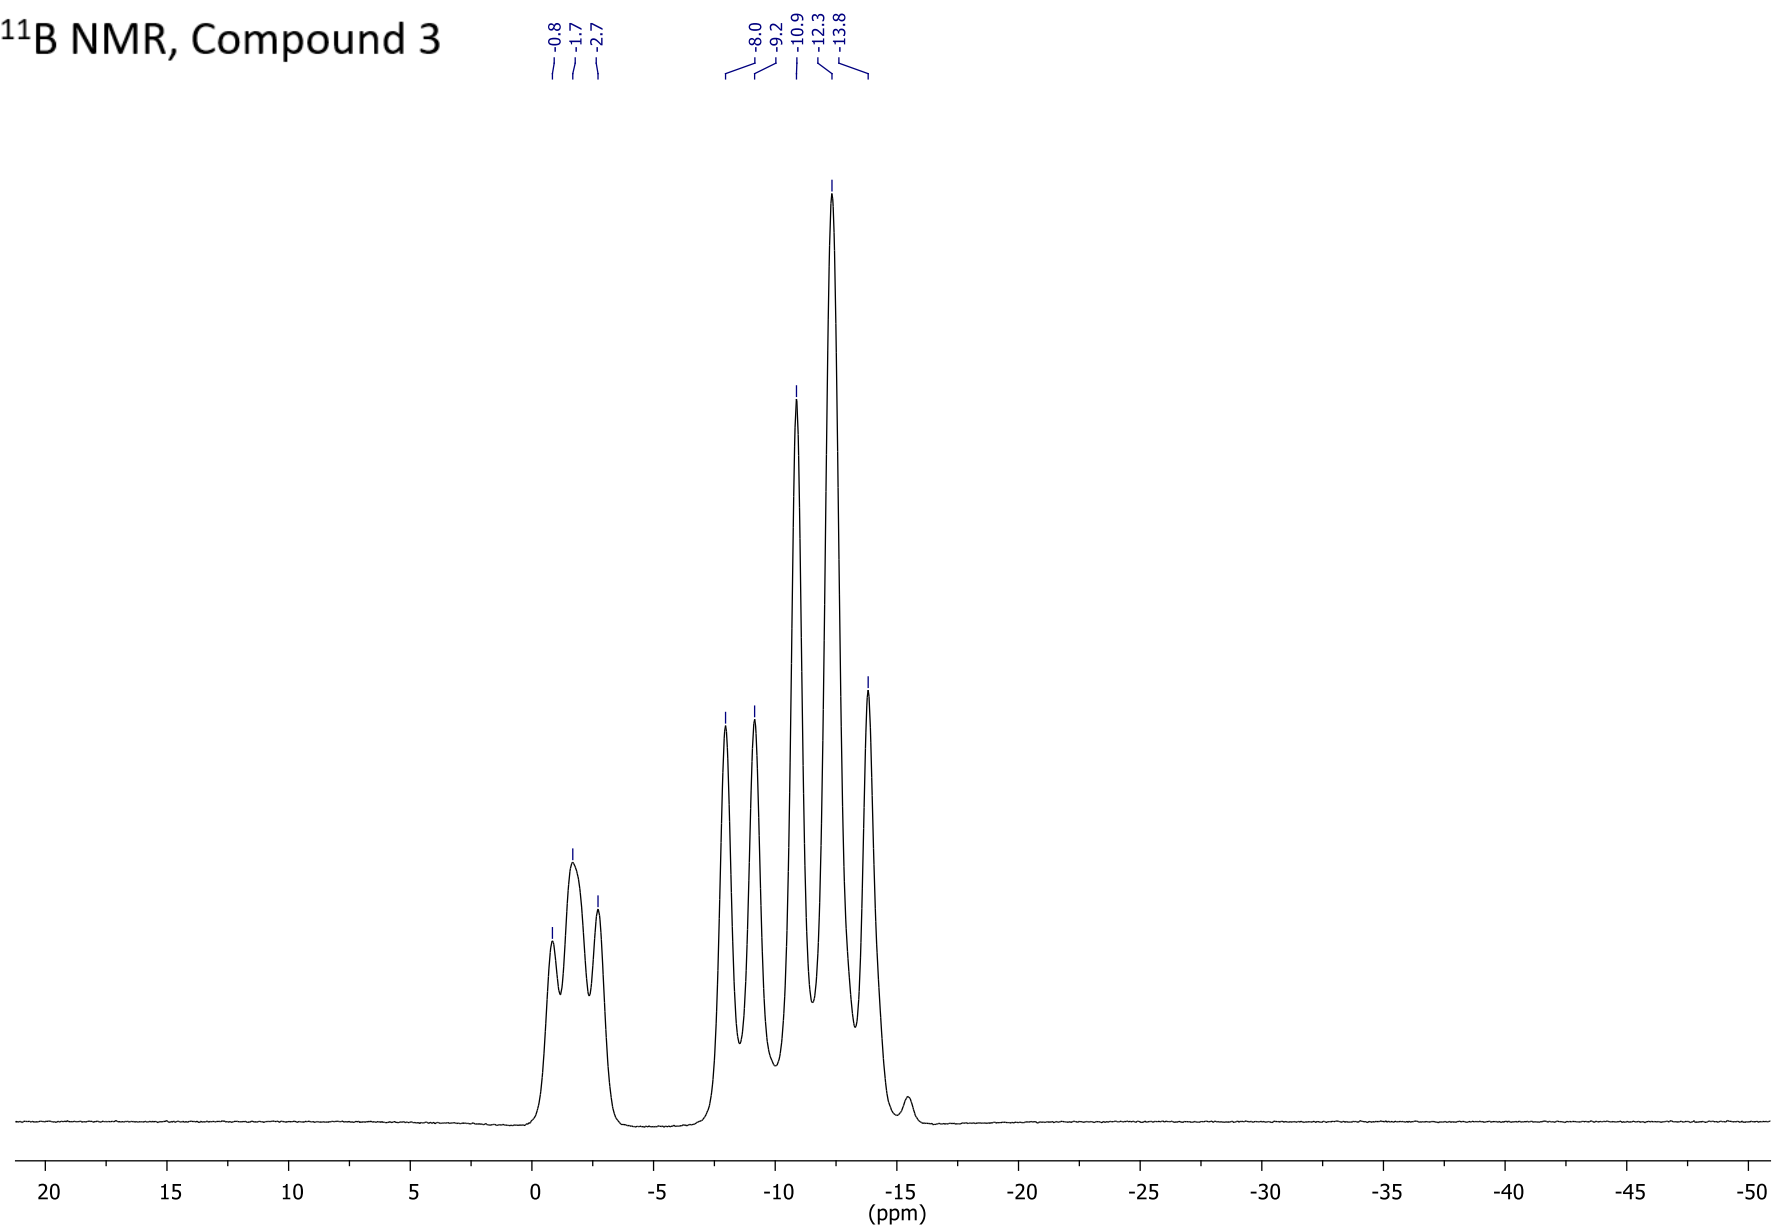

$^1\text{H}$  NMR, Compound 4

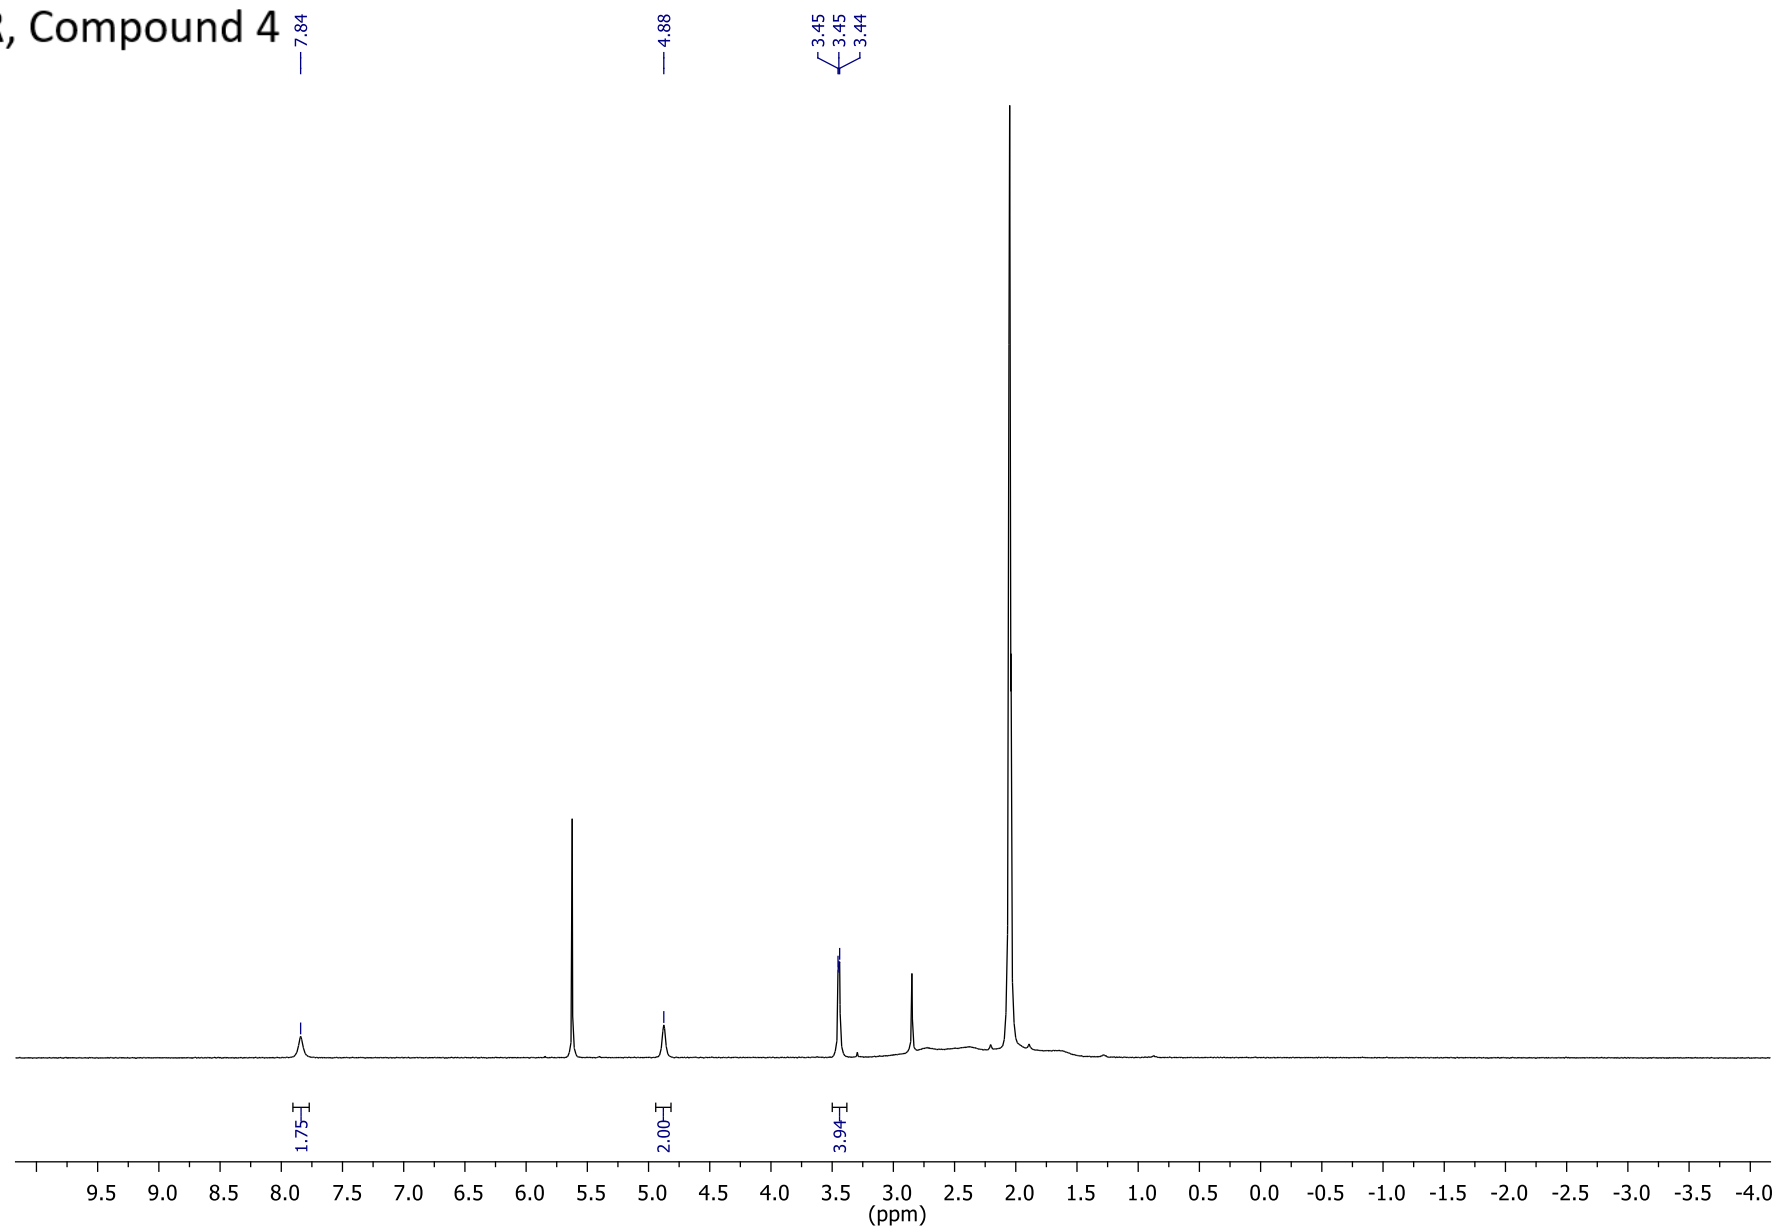

$^{11}\text{B}\{^1\text{H}\}$  NMR, Compound 4

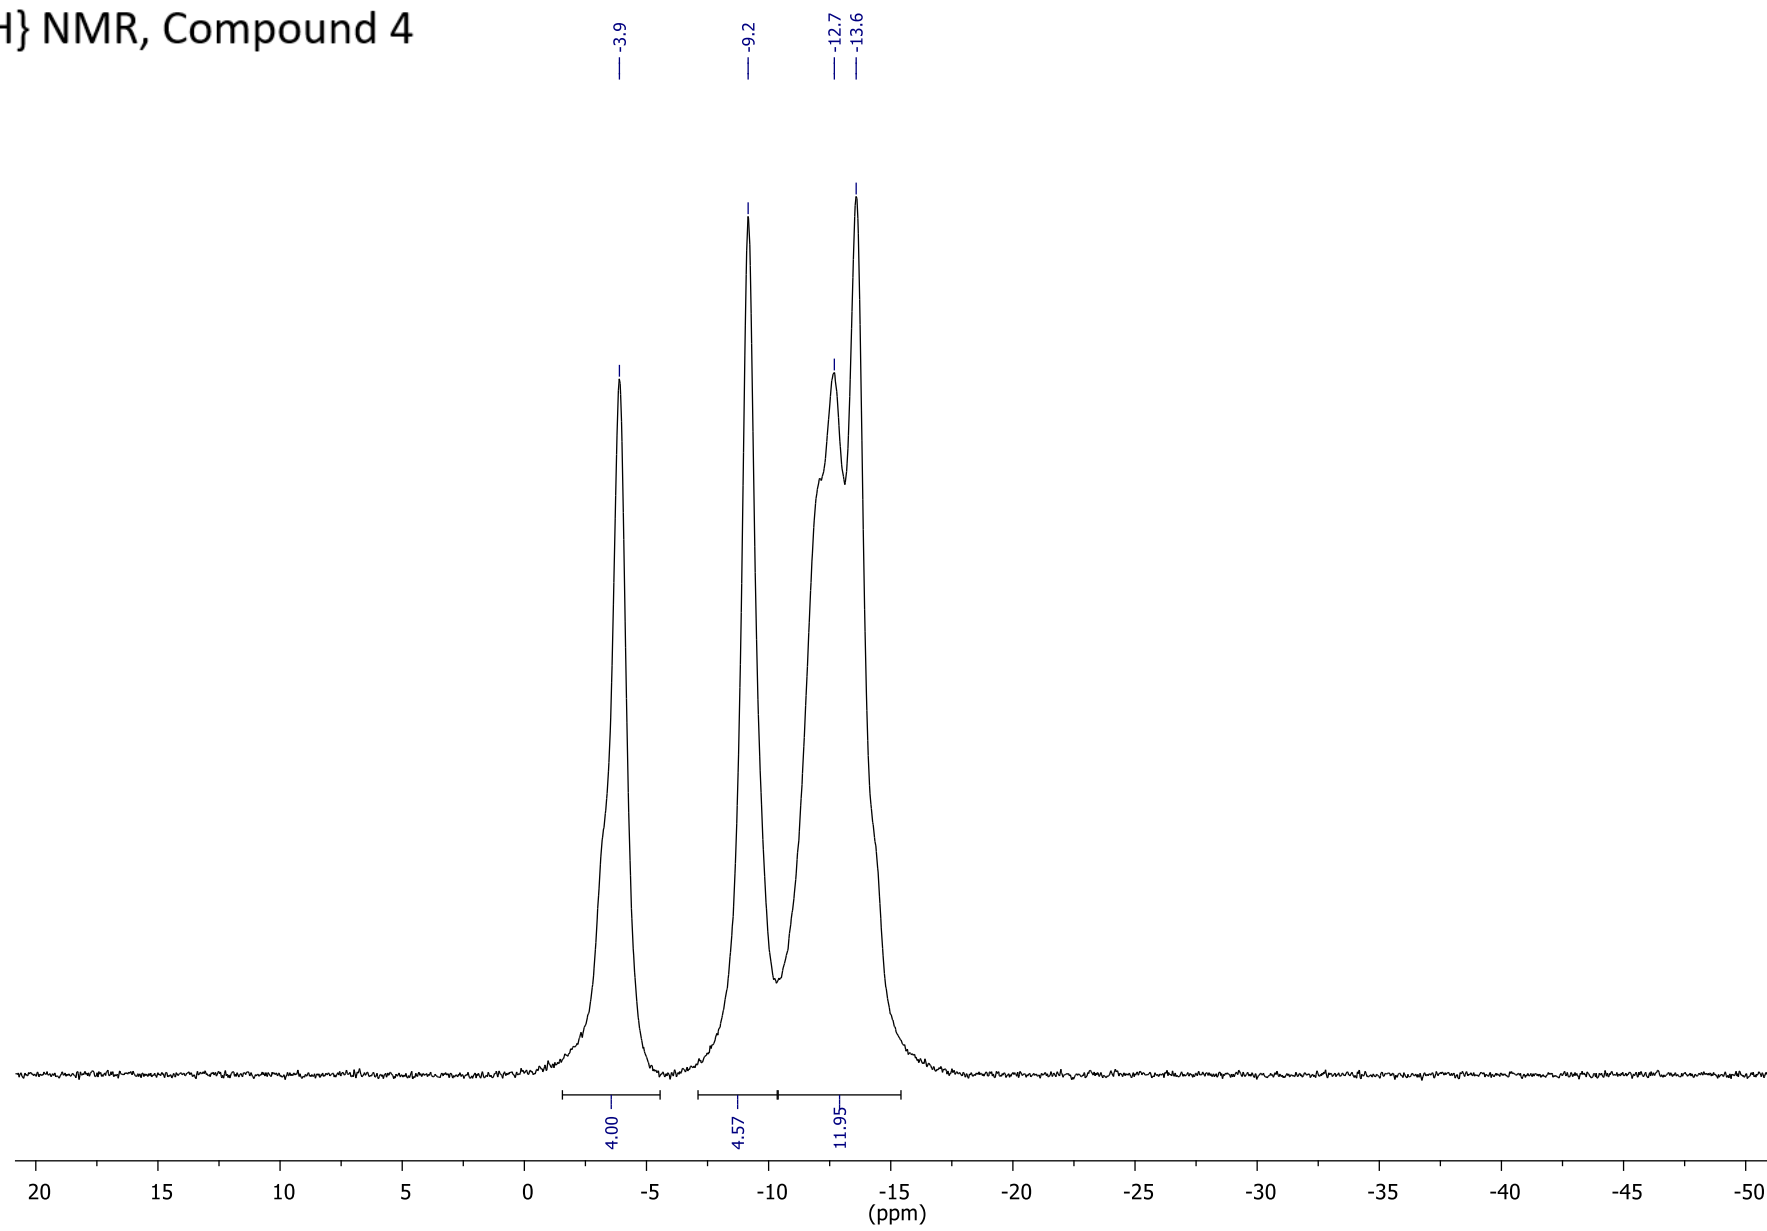

# $^{11}\text{B}$ NMR, Compound 4

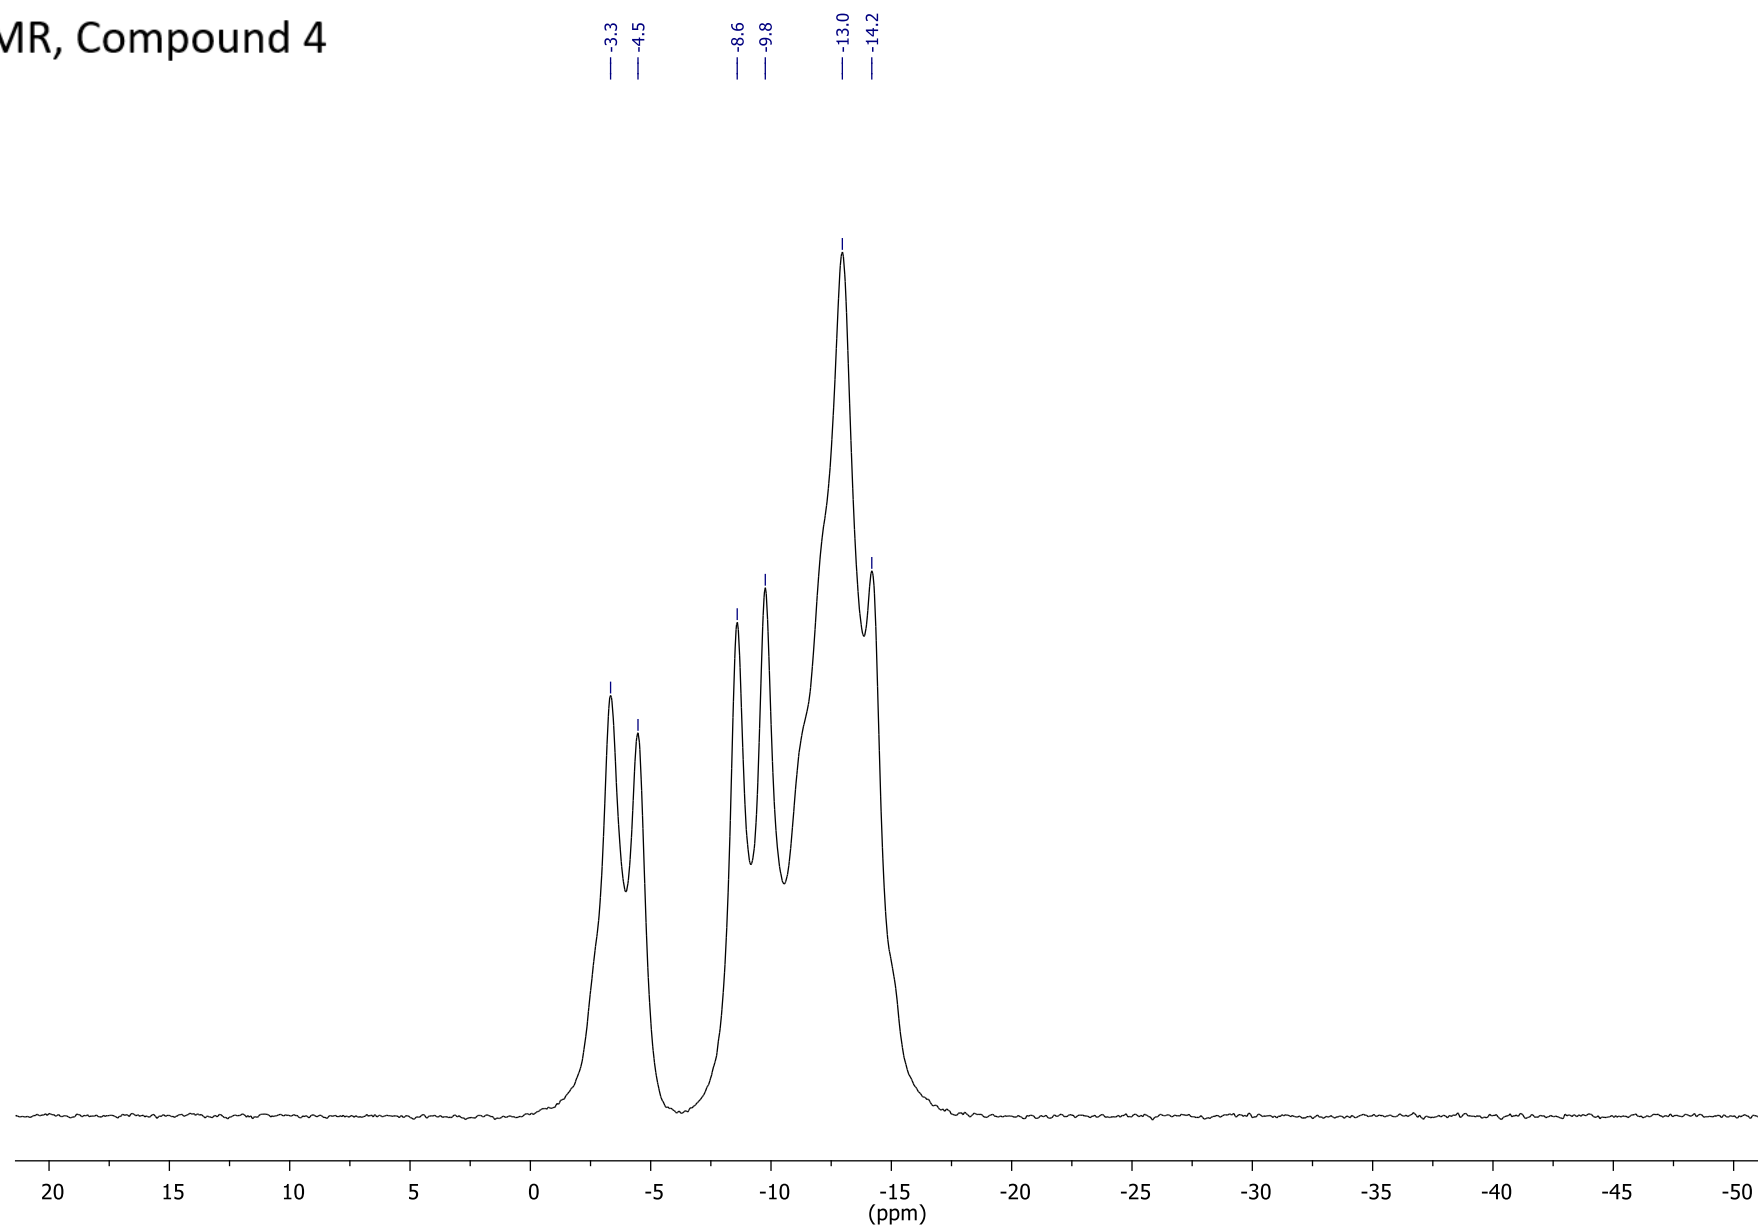

$^{13}\text{C}\{^1\text{H}\}$  NMR, Compound 4

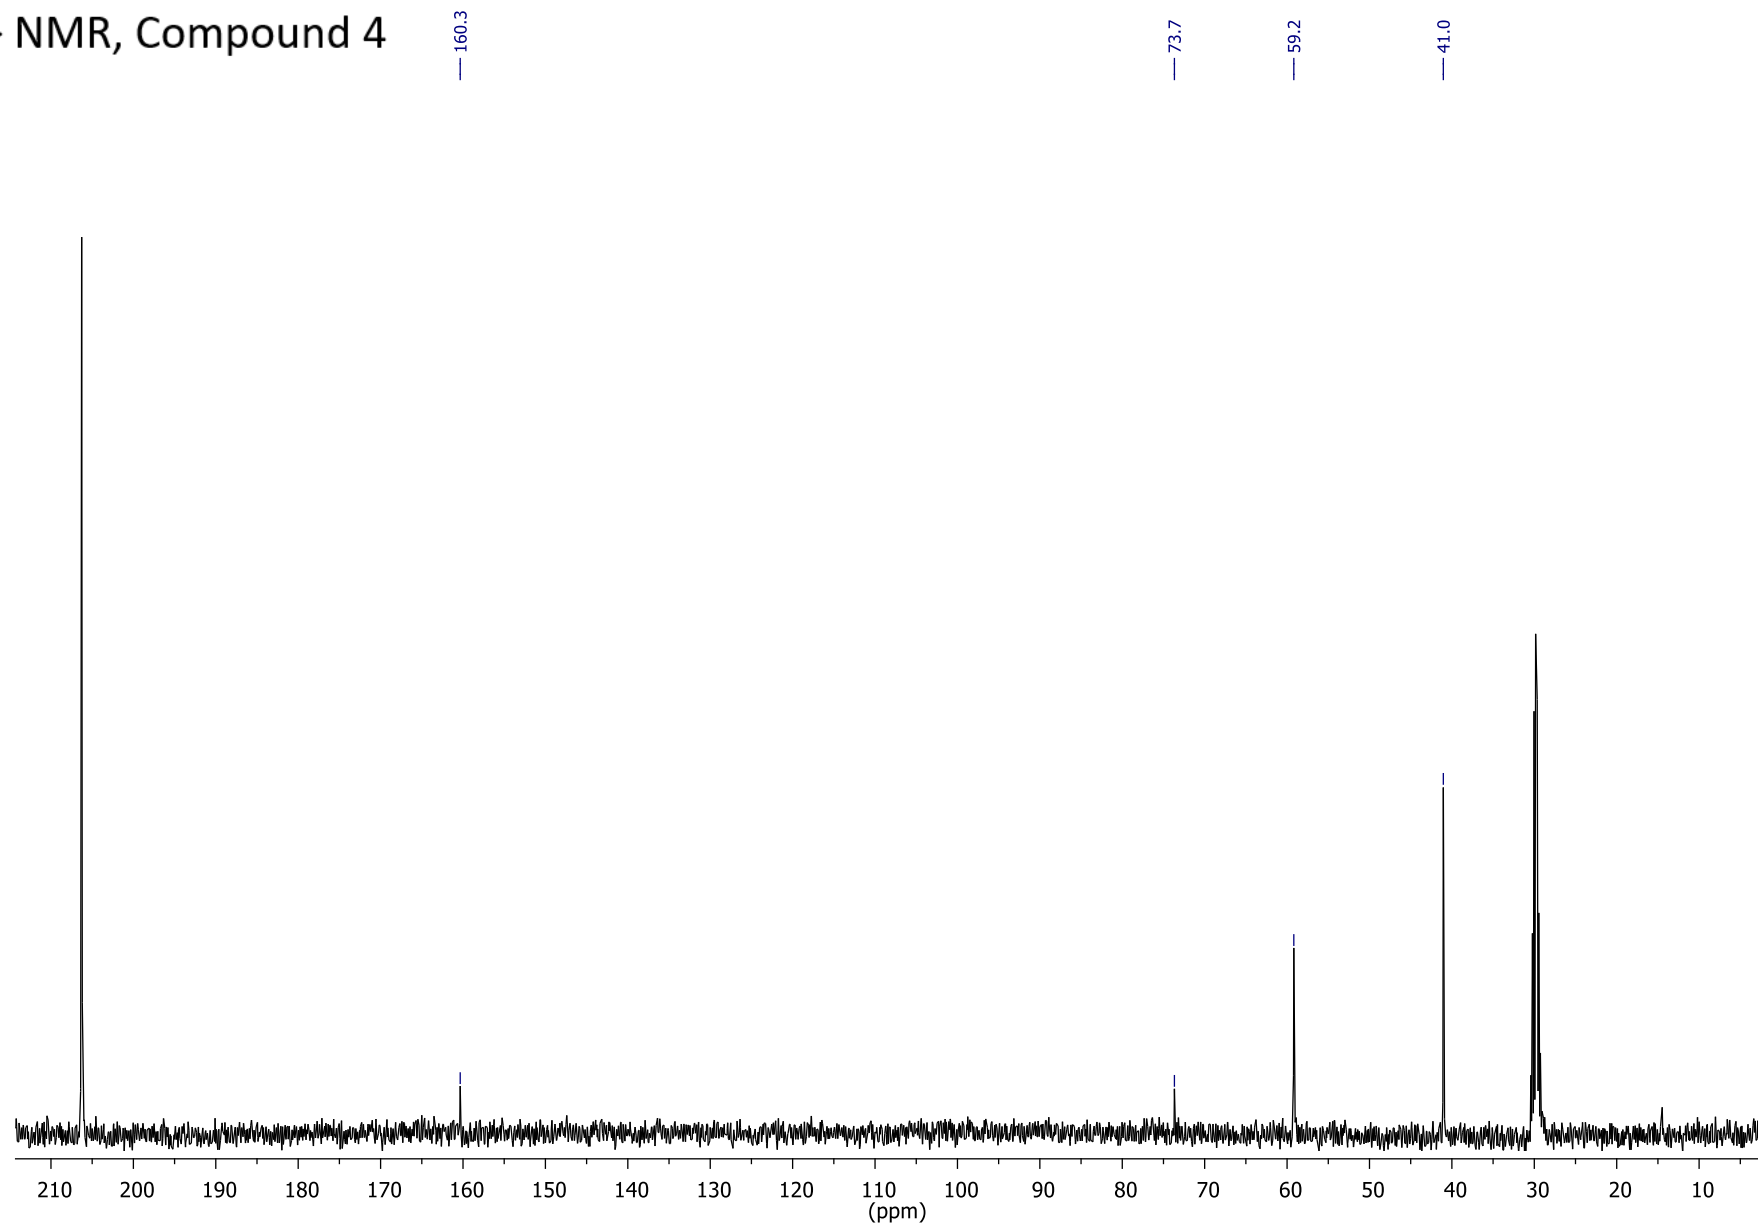



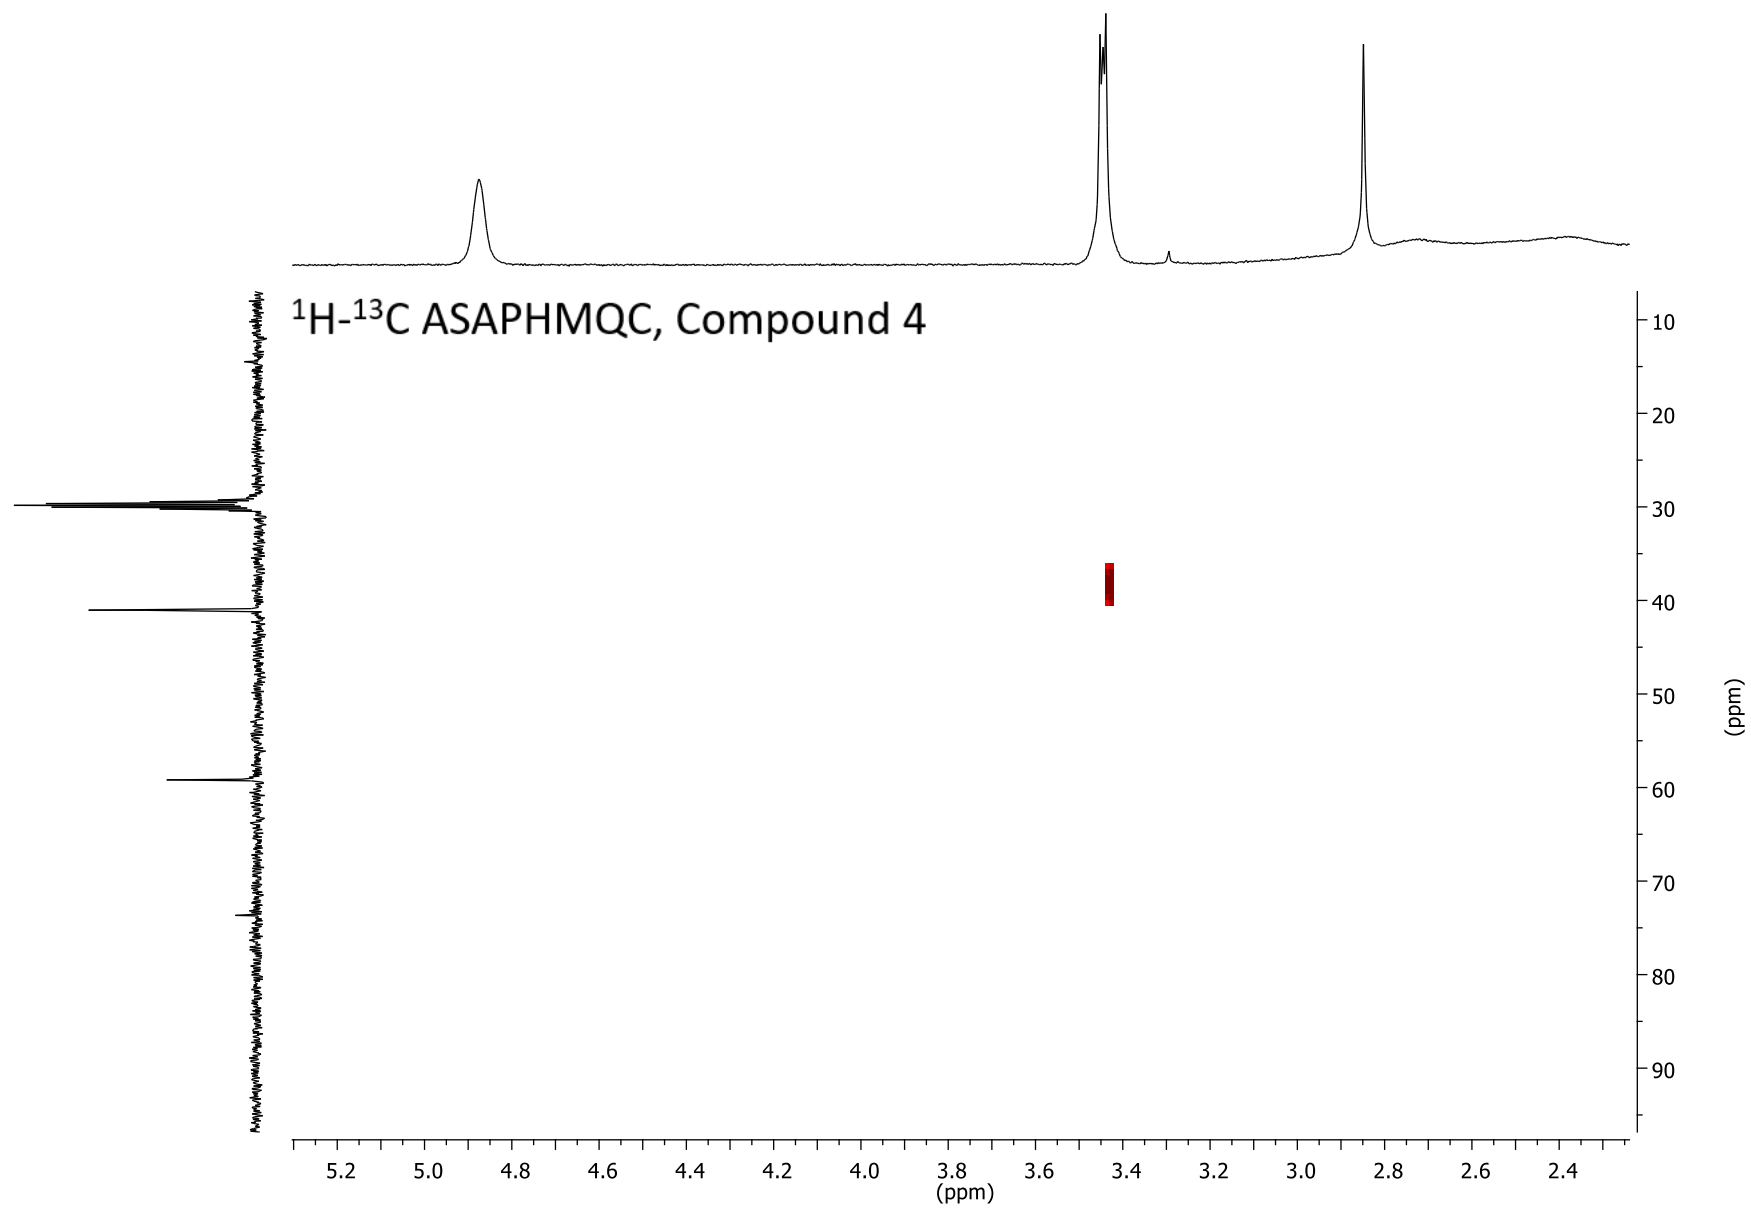

$^1\text{H}$  NMR, Compound 6

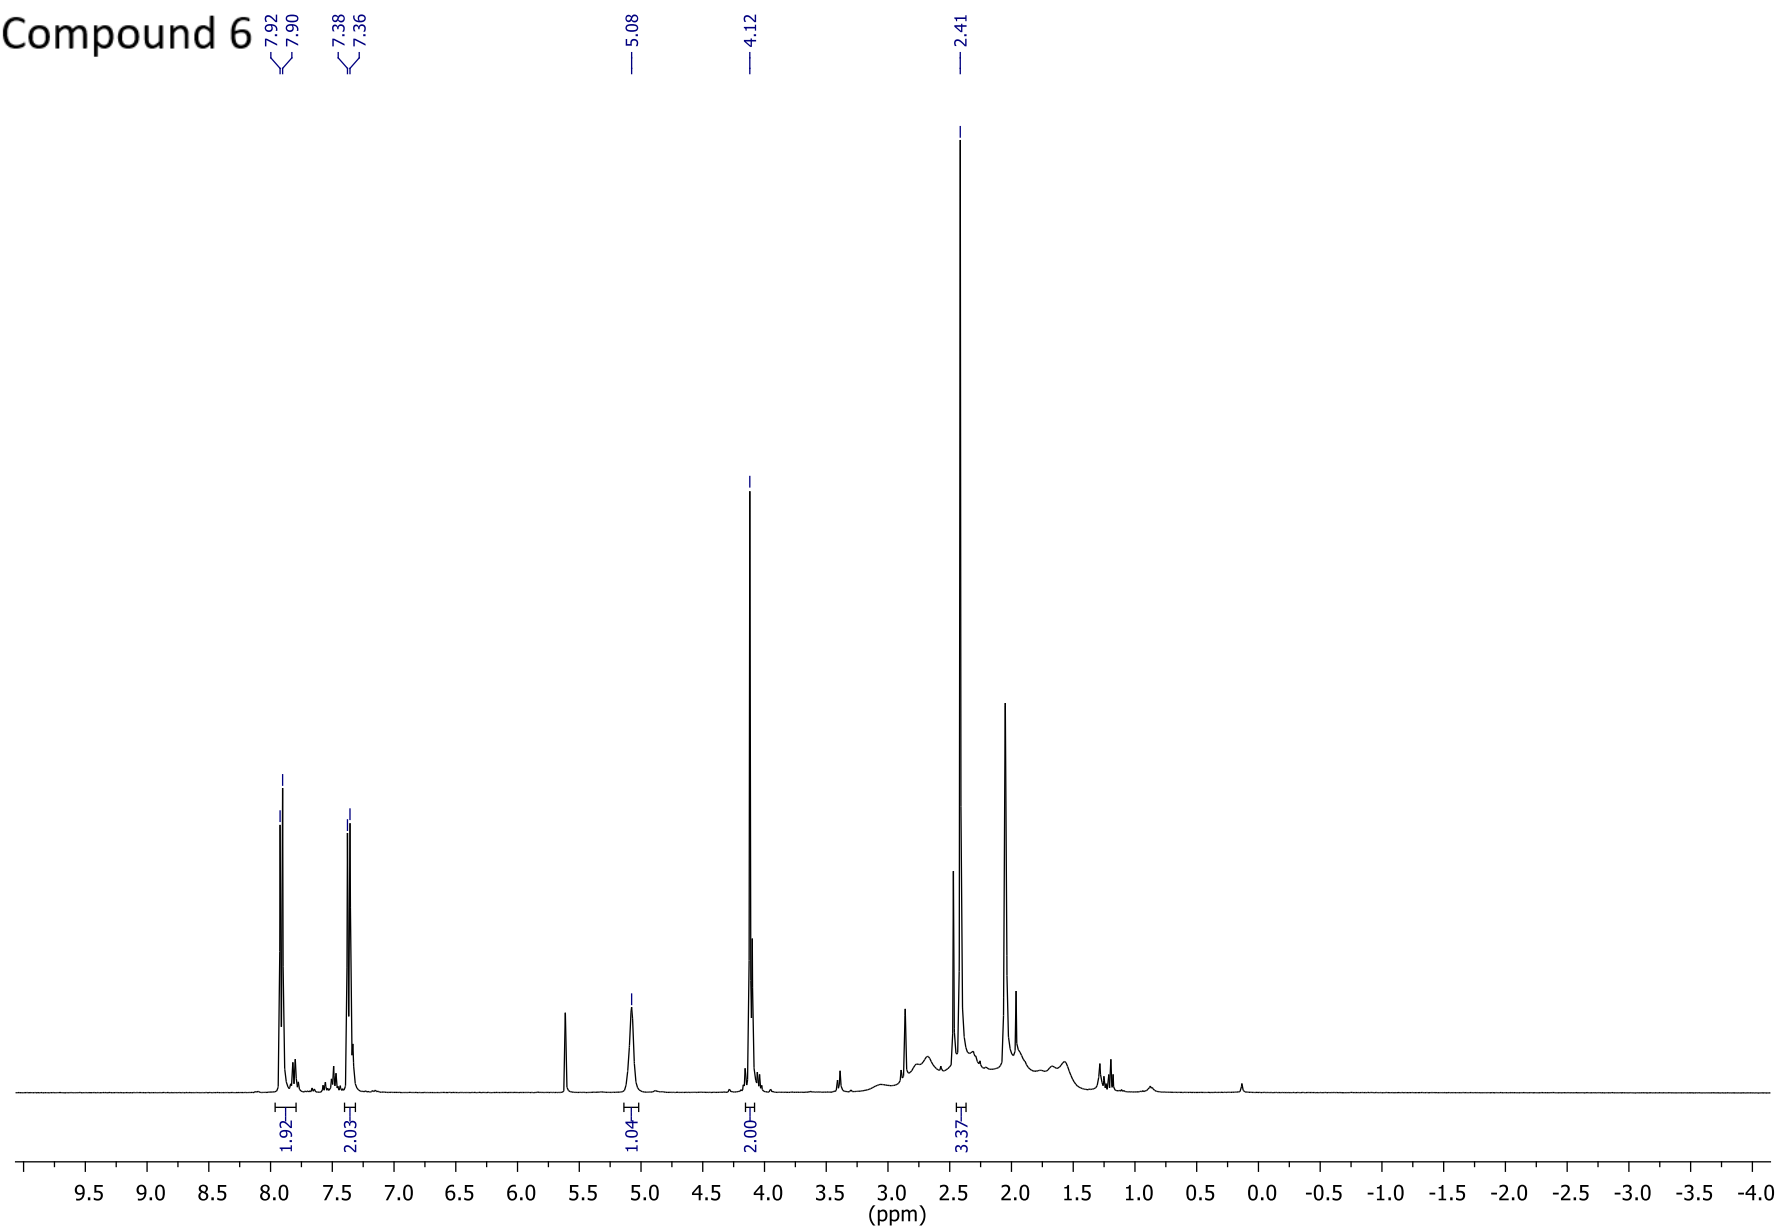

$^{11}\text{B}$  NMR, Compound 6

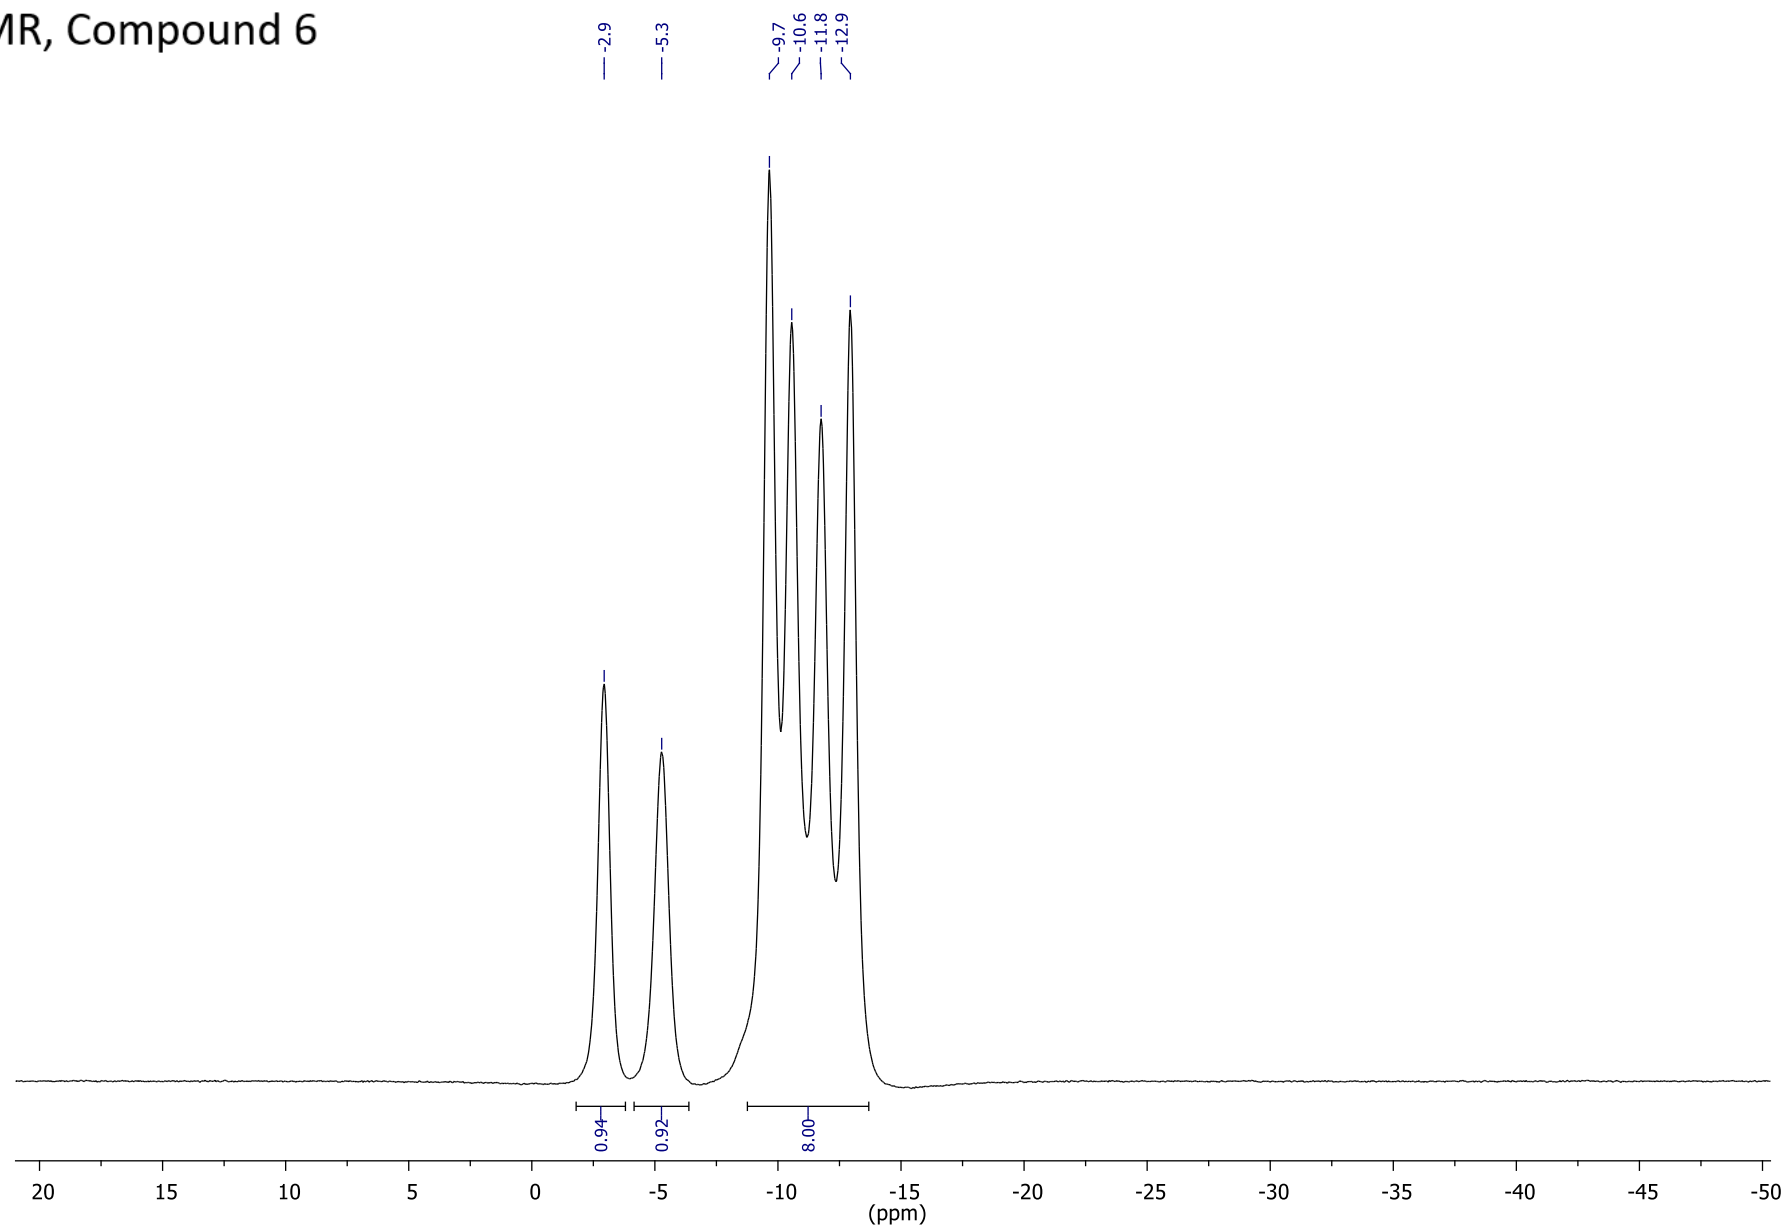

$^{11}\text{B}\{^1\text{H}\}$  NMR, Compound 6

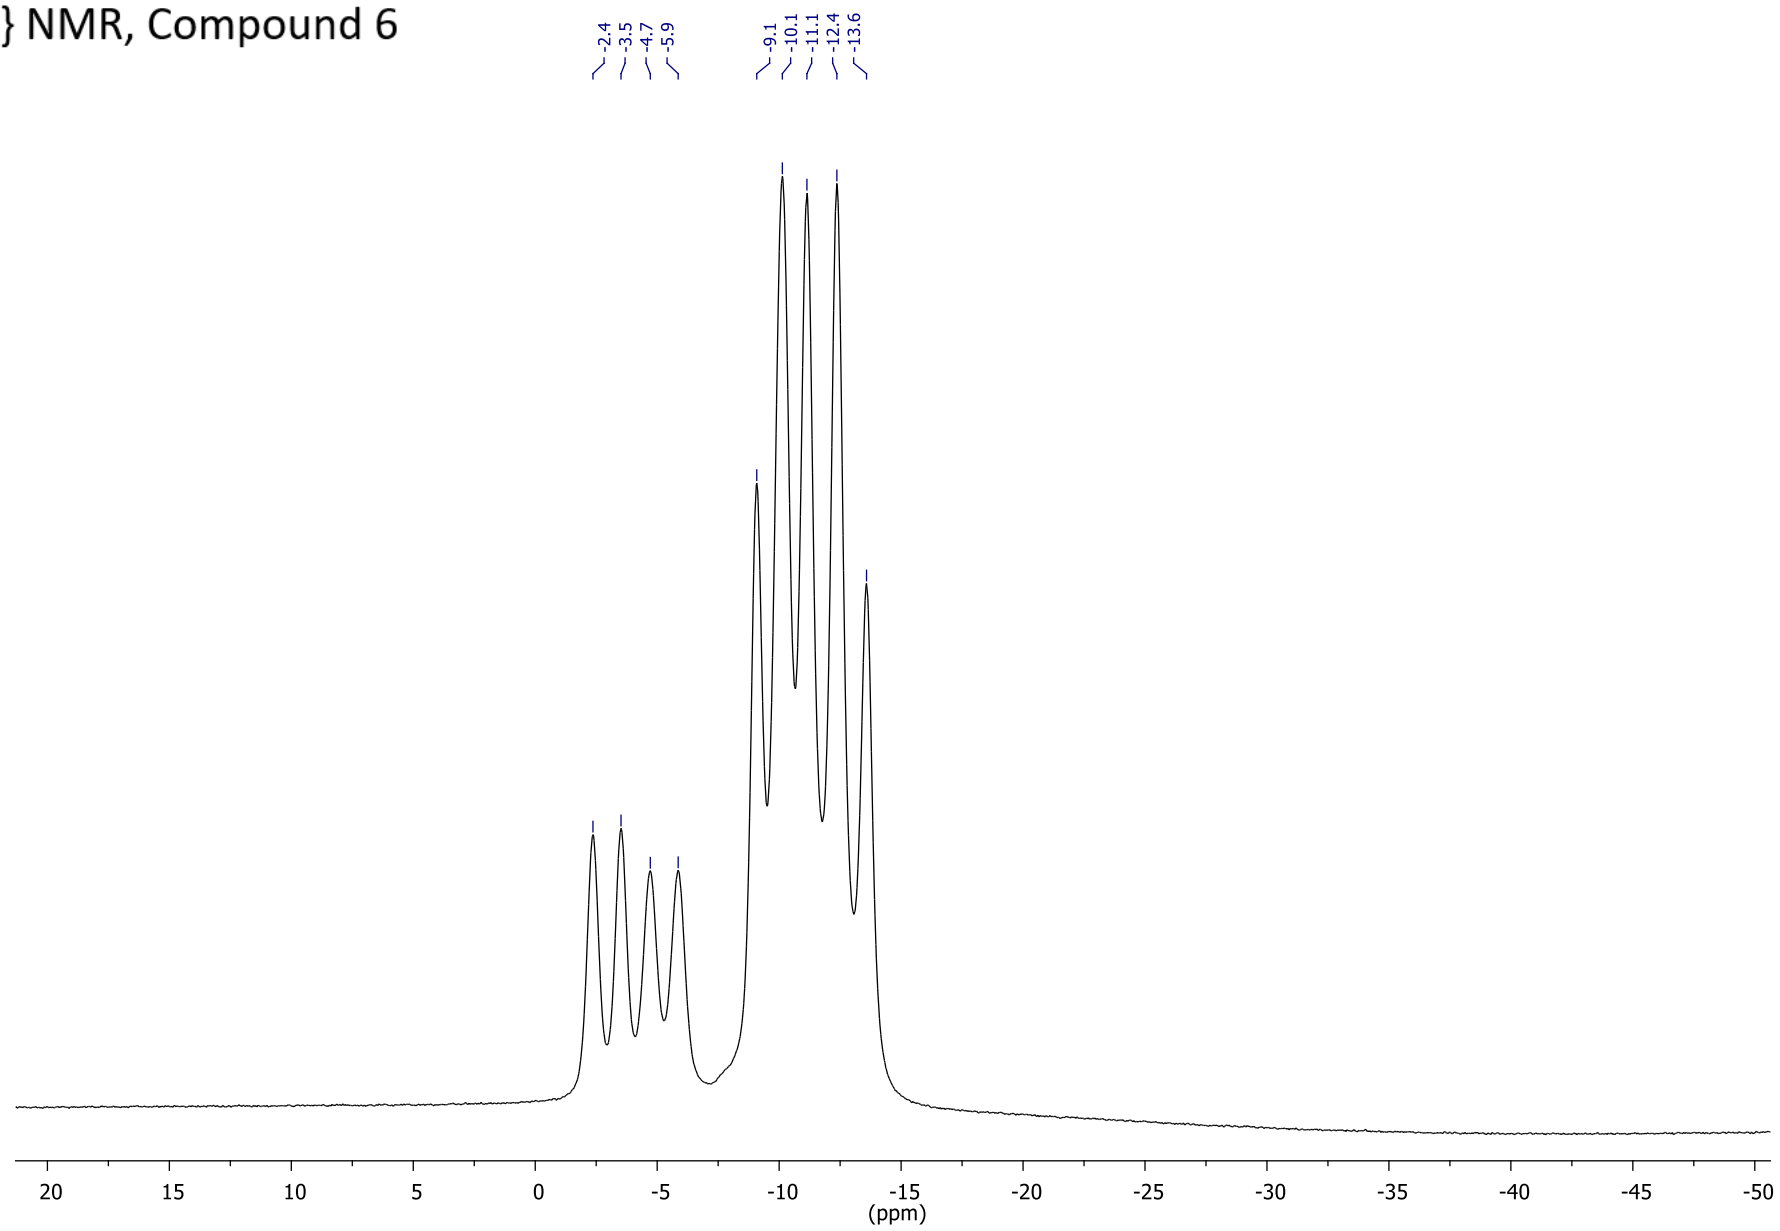

$^1\text{H}$  NMR, Compound 7

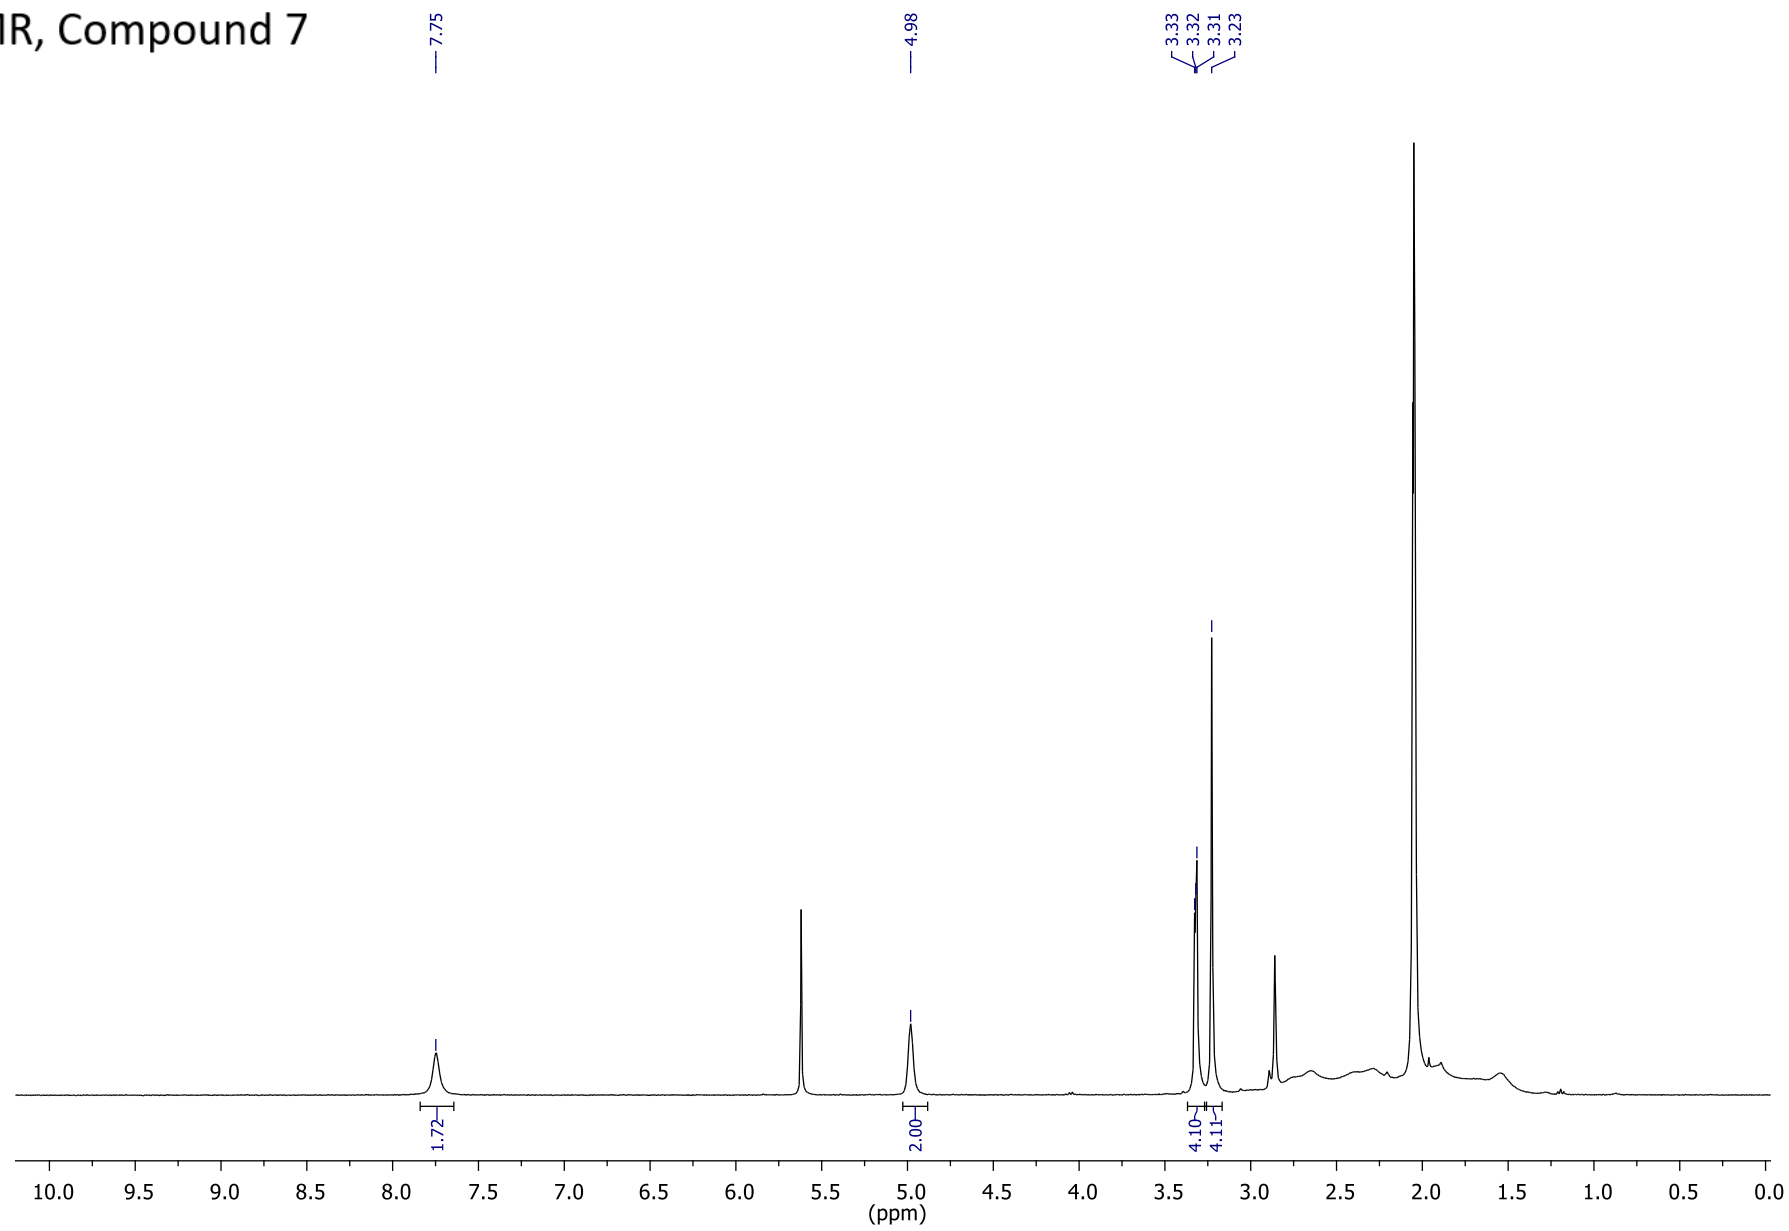

$^{11}\text{B}\{^1\text{H}\}$  NMR, Compound 7

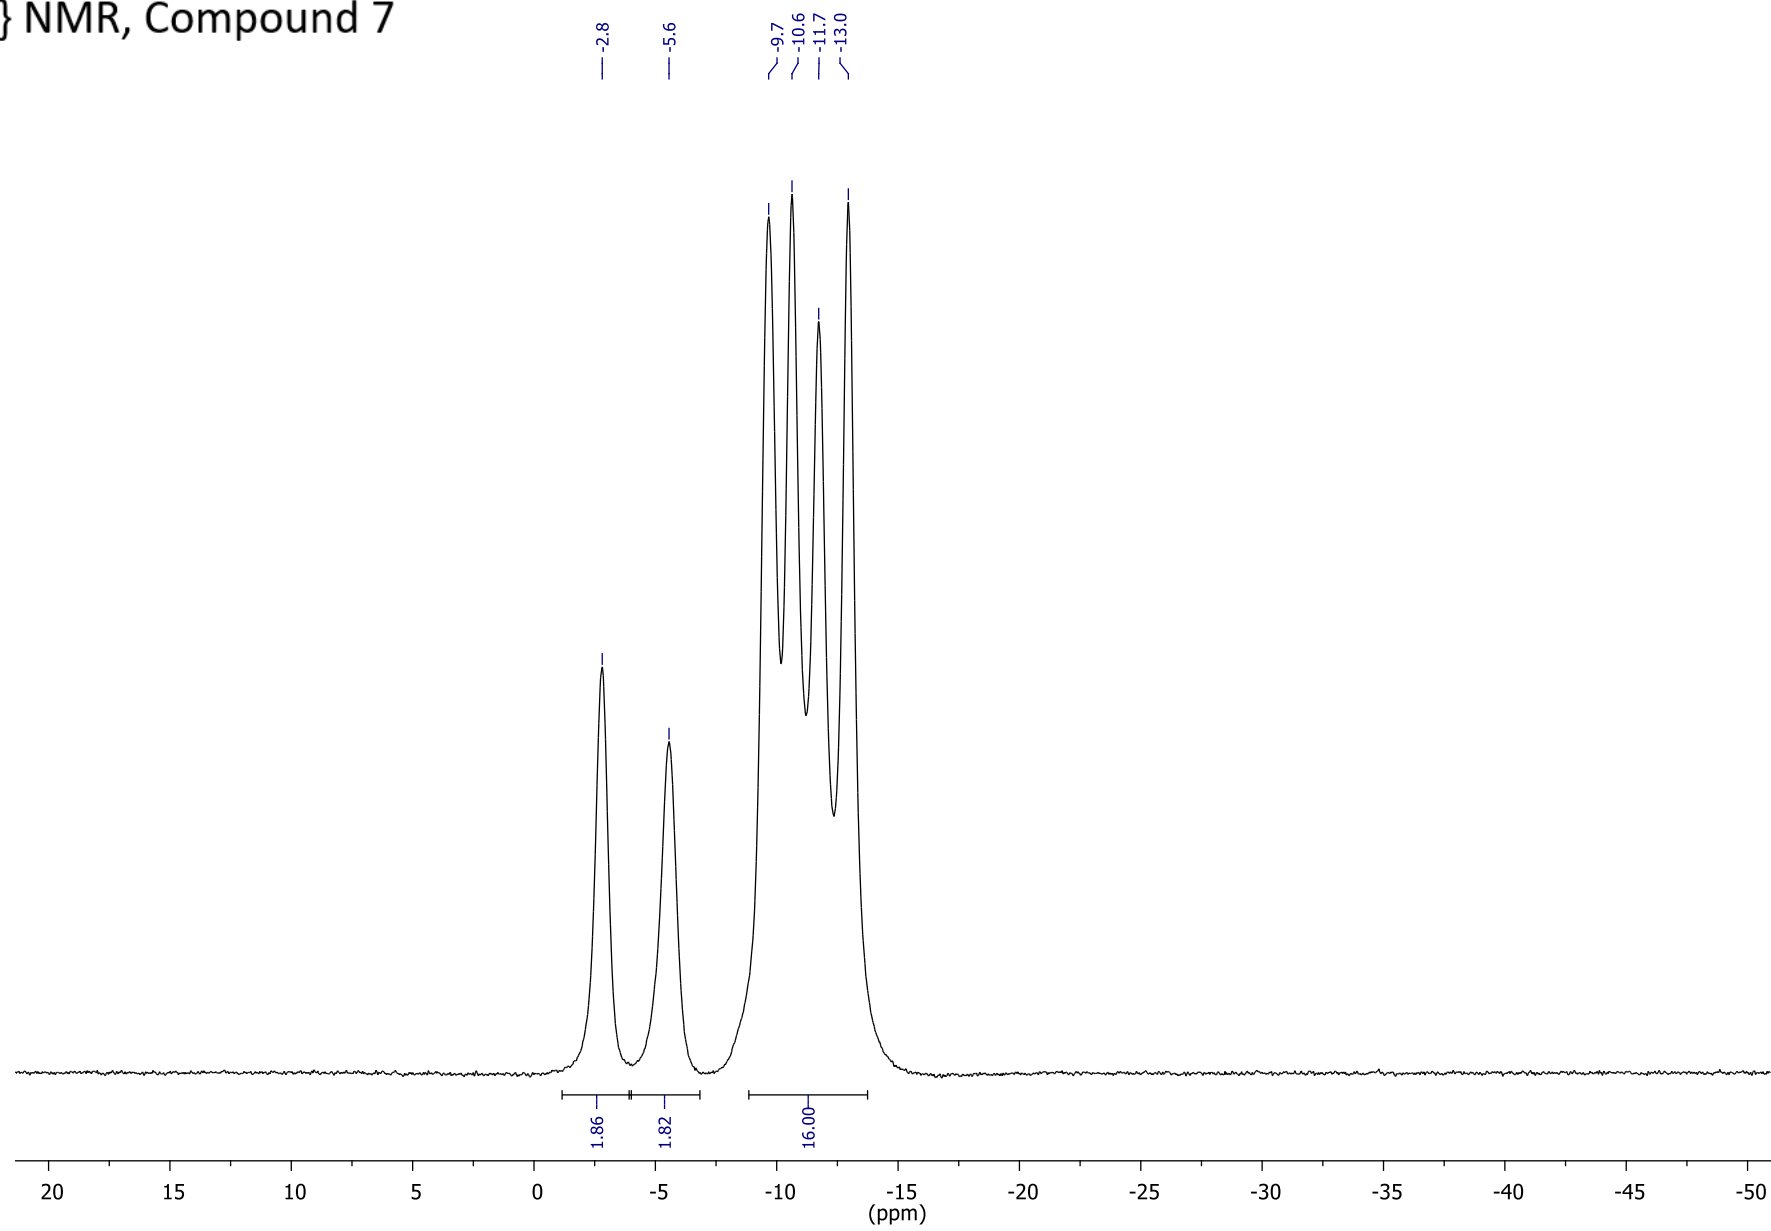

$^{11}\text{B}$  NMR, Compound 7

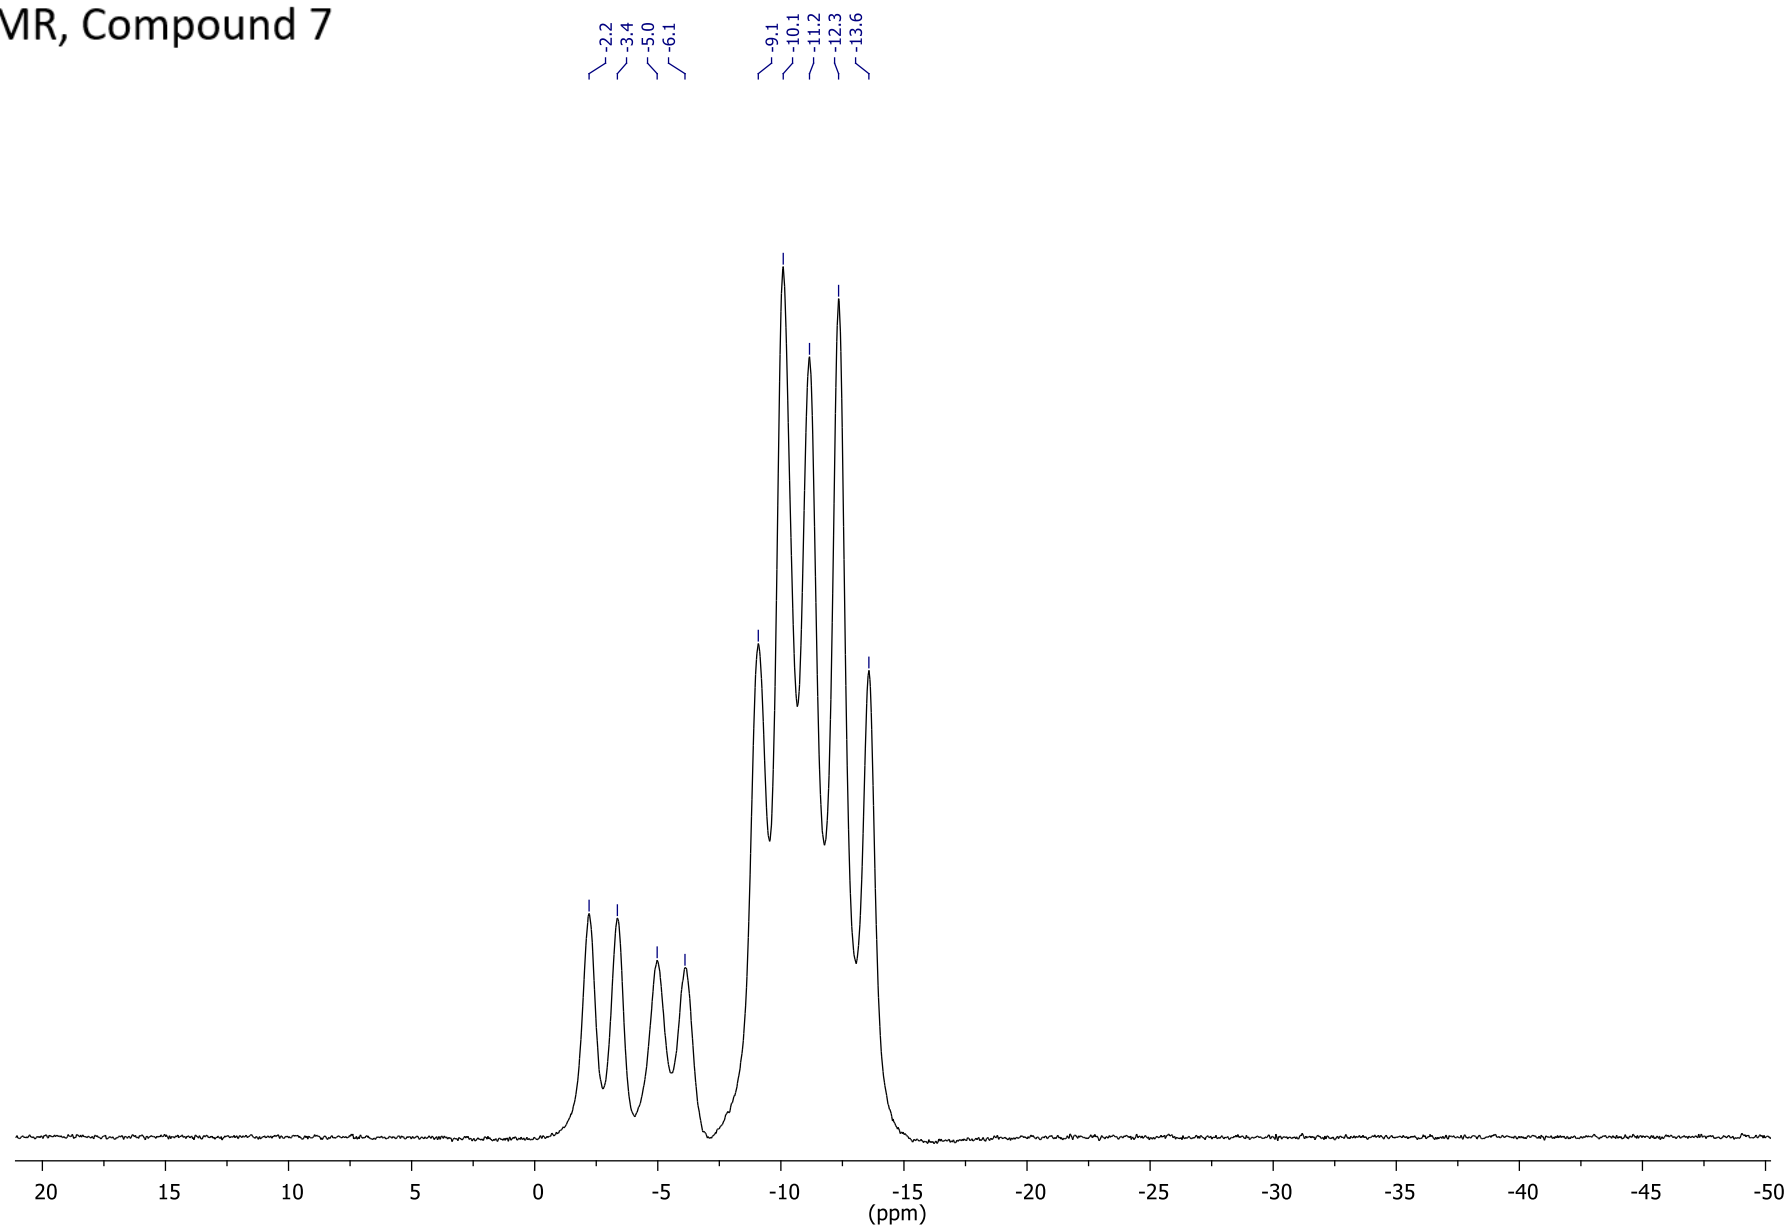

$^{13}\text{C}\{^1\text{H}\}$  NMR, Compound 7

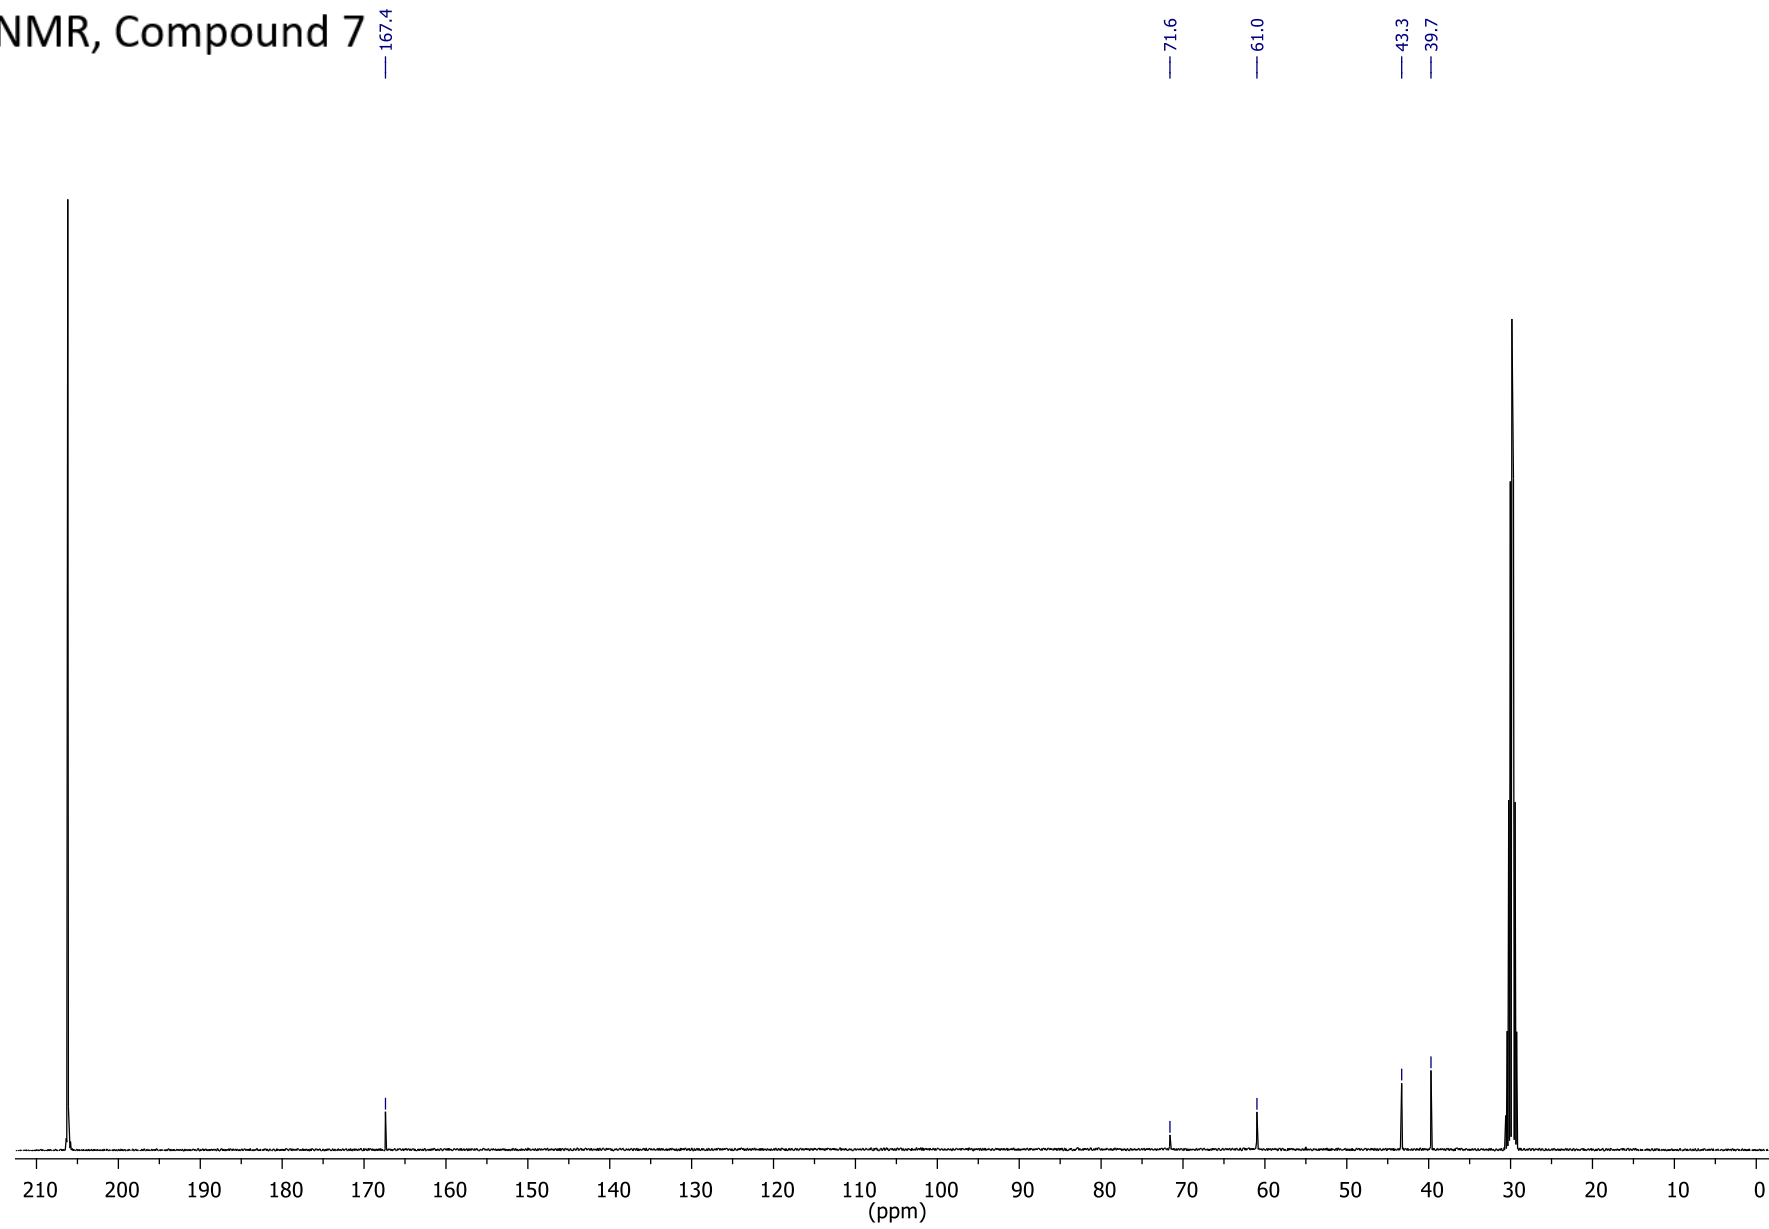



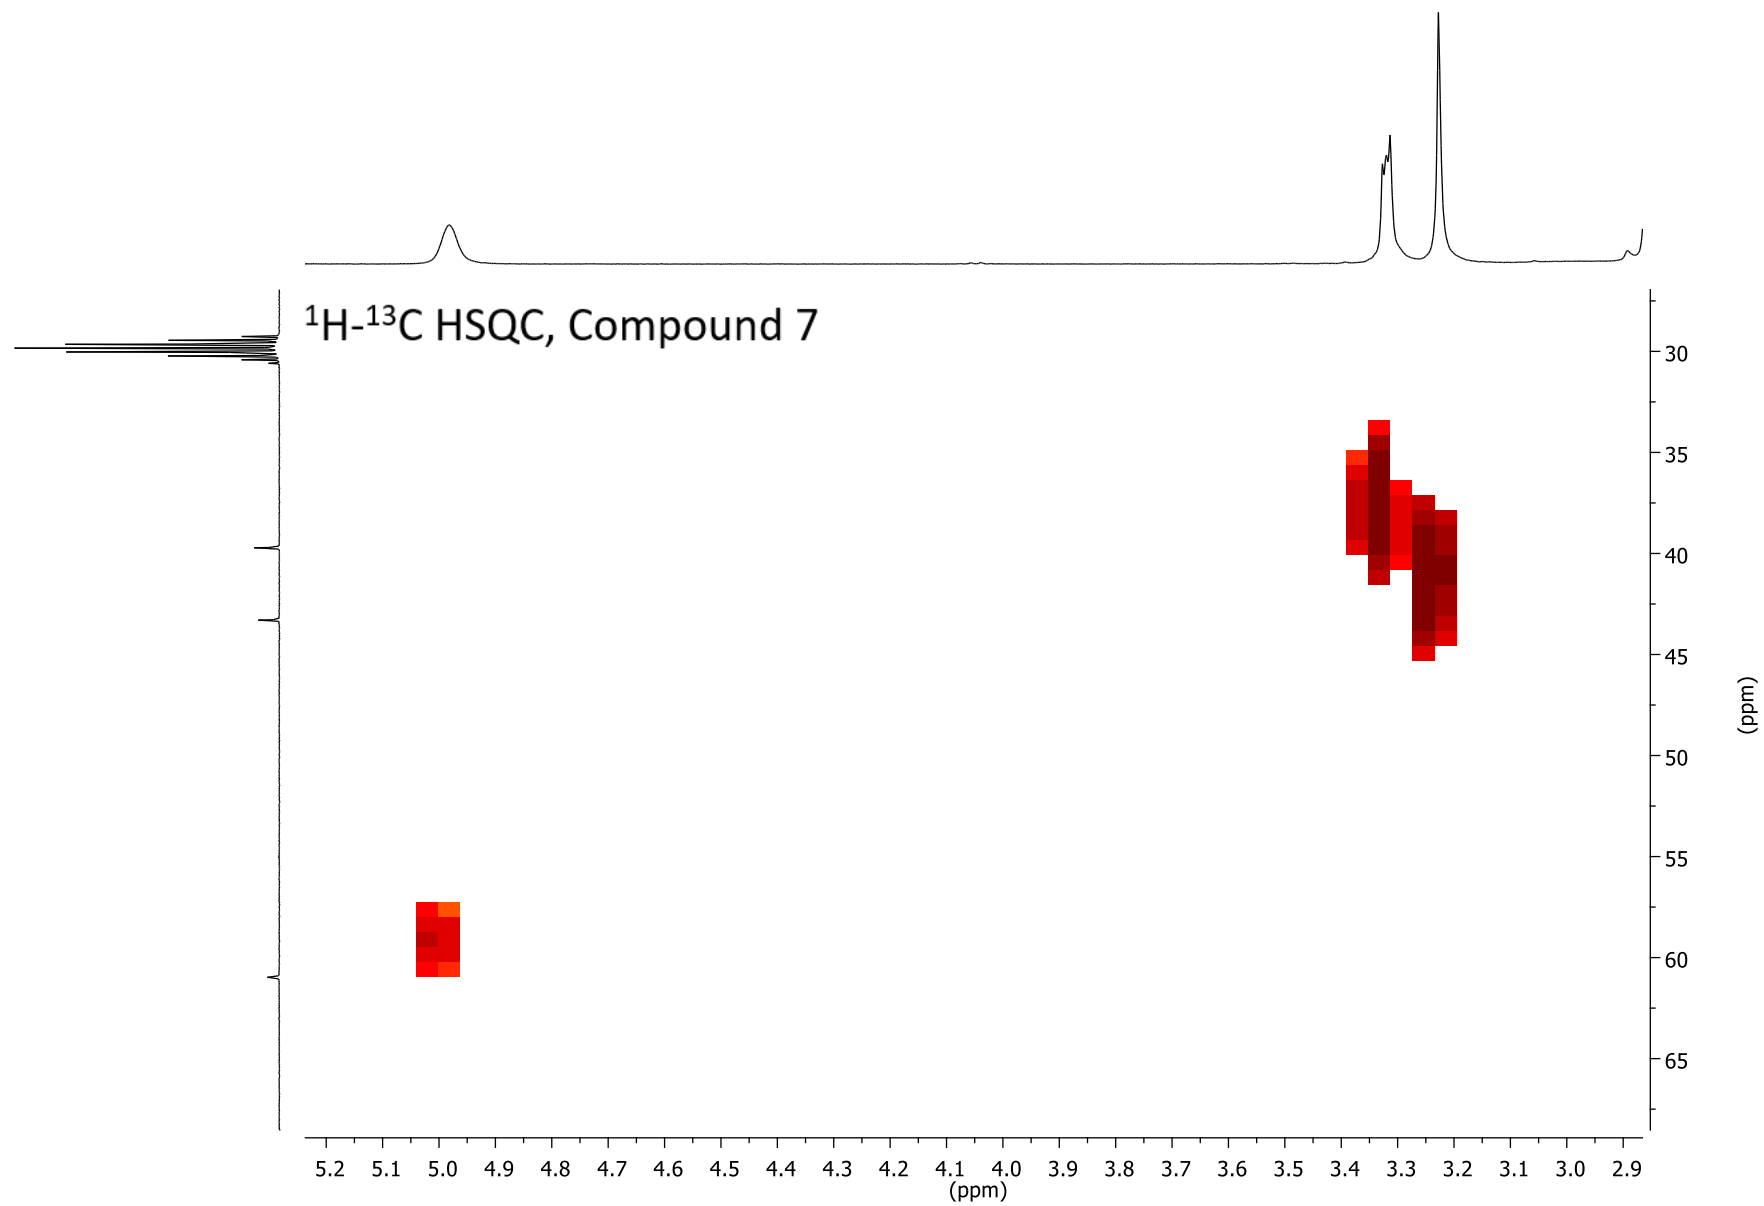

$^1\text{H}$  NMR,  $(\text{Me}_3\text{NH})_2[8]$

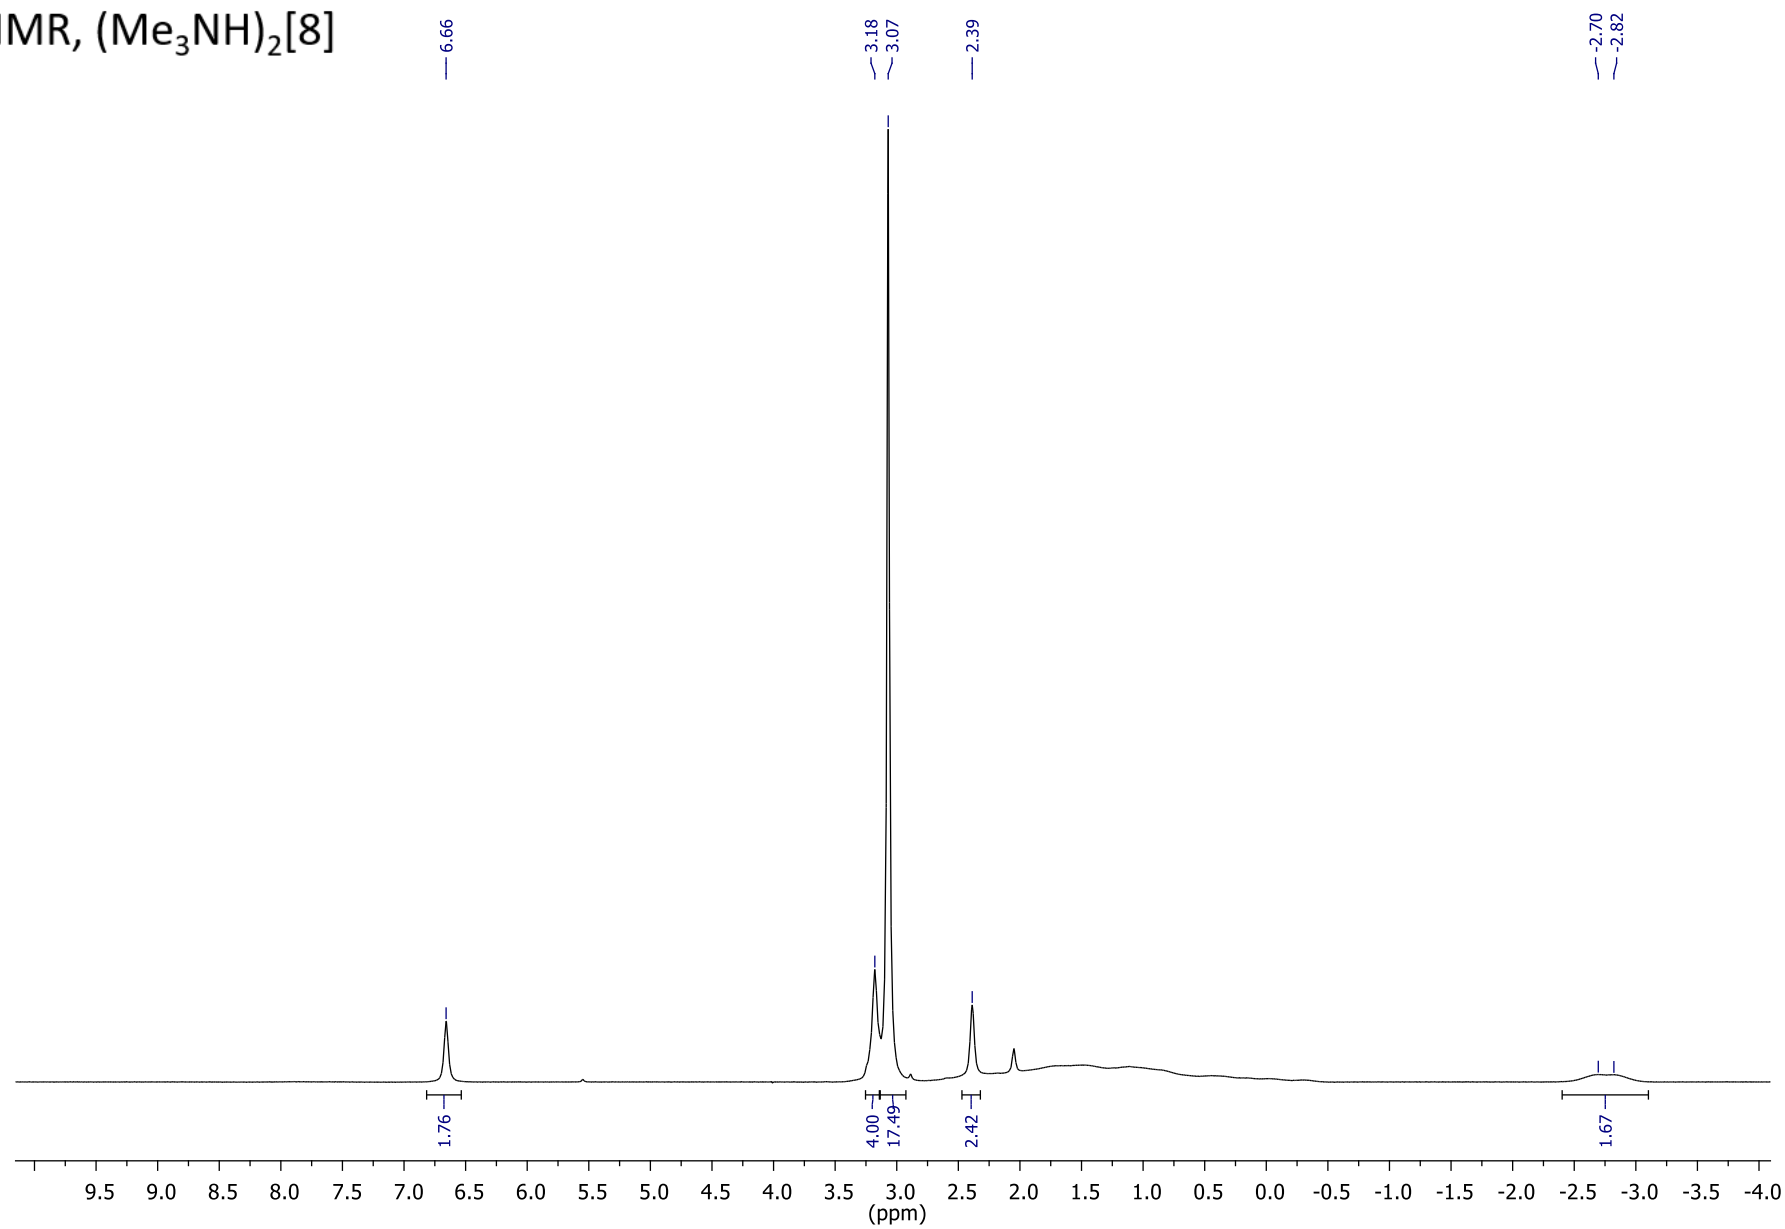

$^{11}\text{B}\{^1\text{H}\}$  NMR,  $(\text{Me}_3\text{NH})_2[8]$

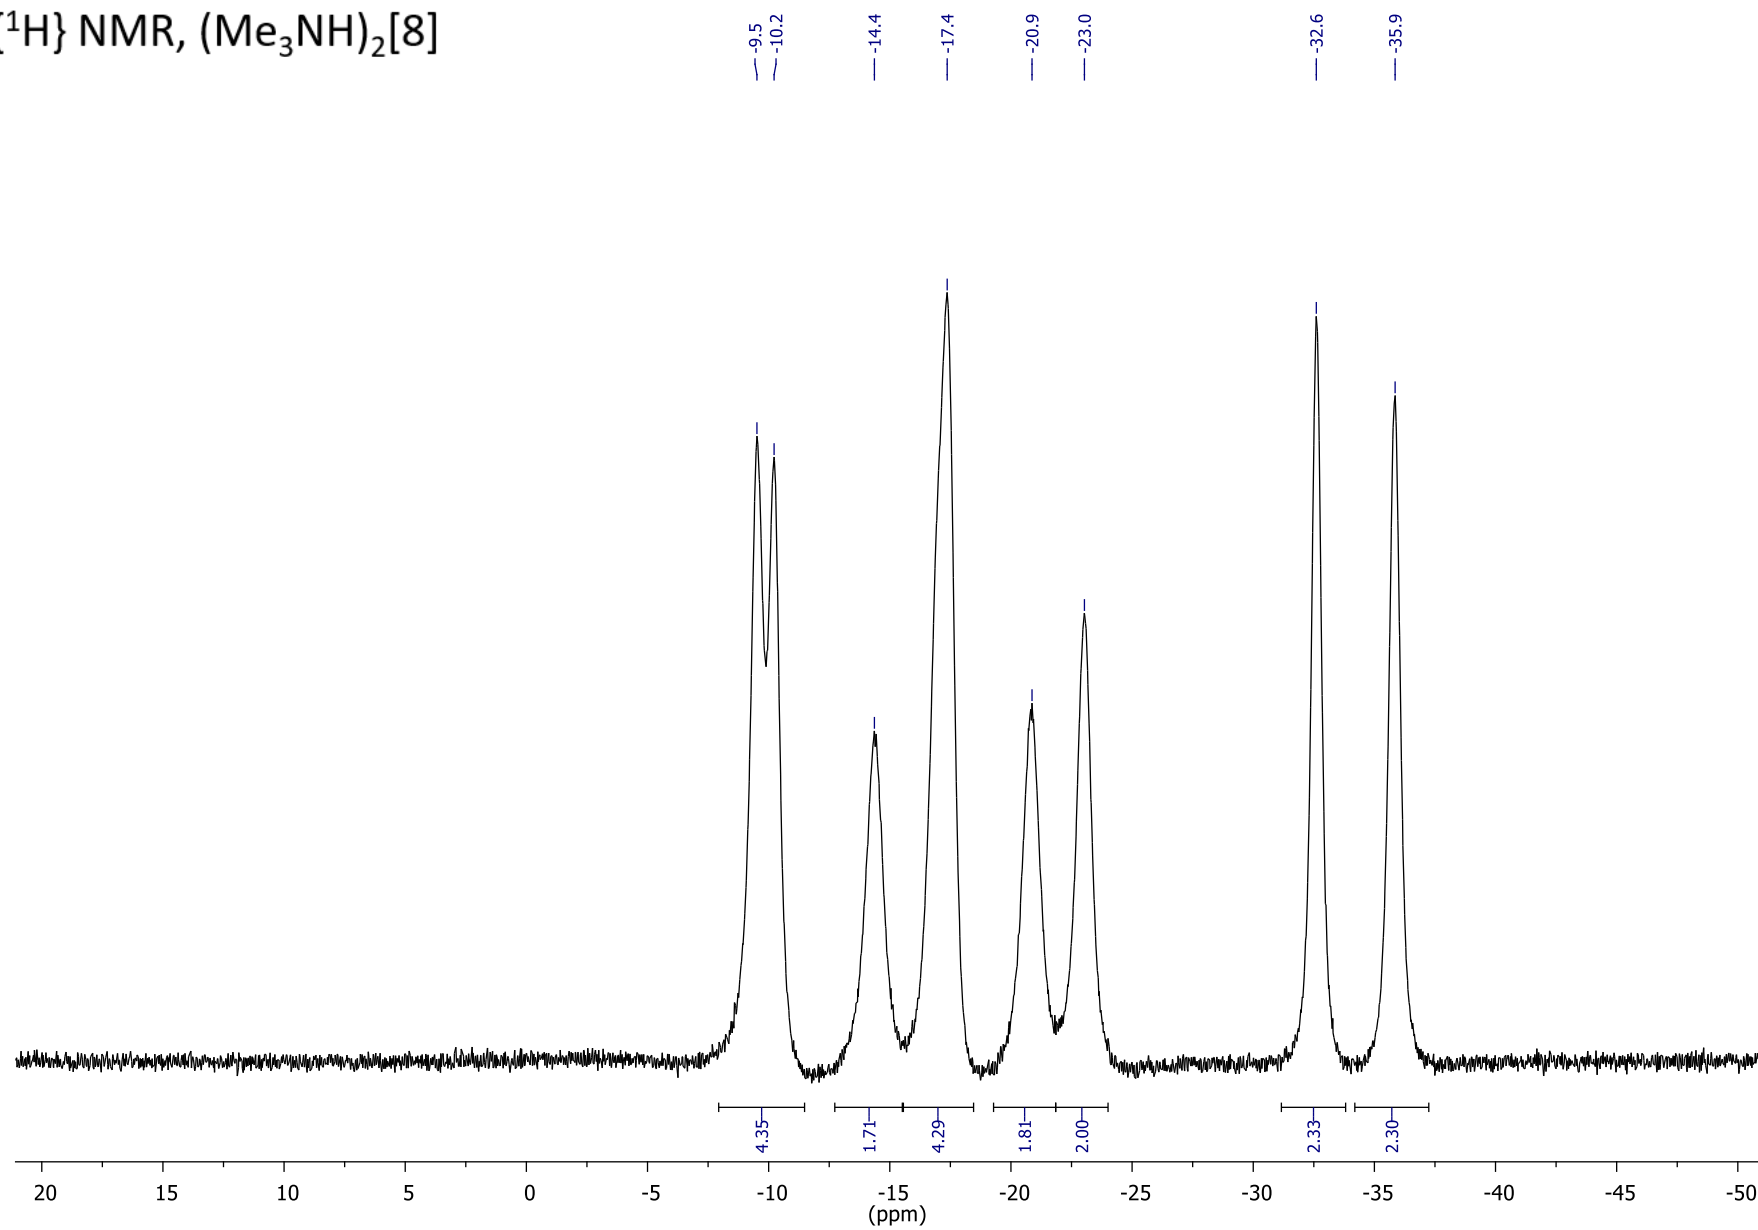

$^{11}\text{B}$  NMR,  $(\text{Me}_3\text{NH})_2[8]$

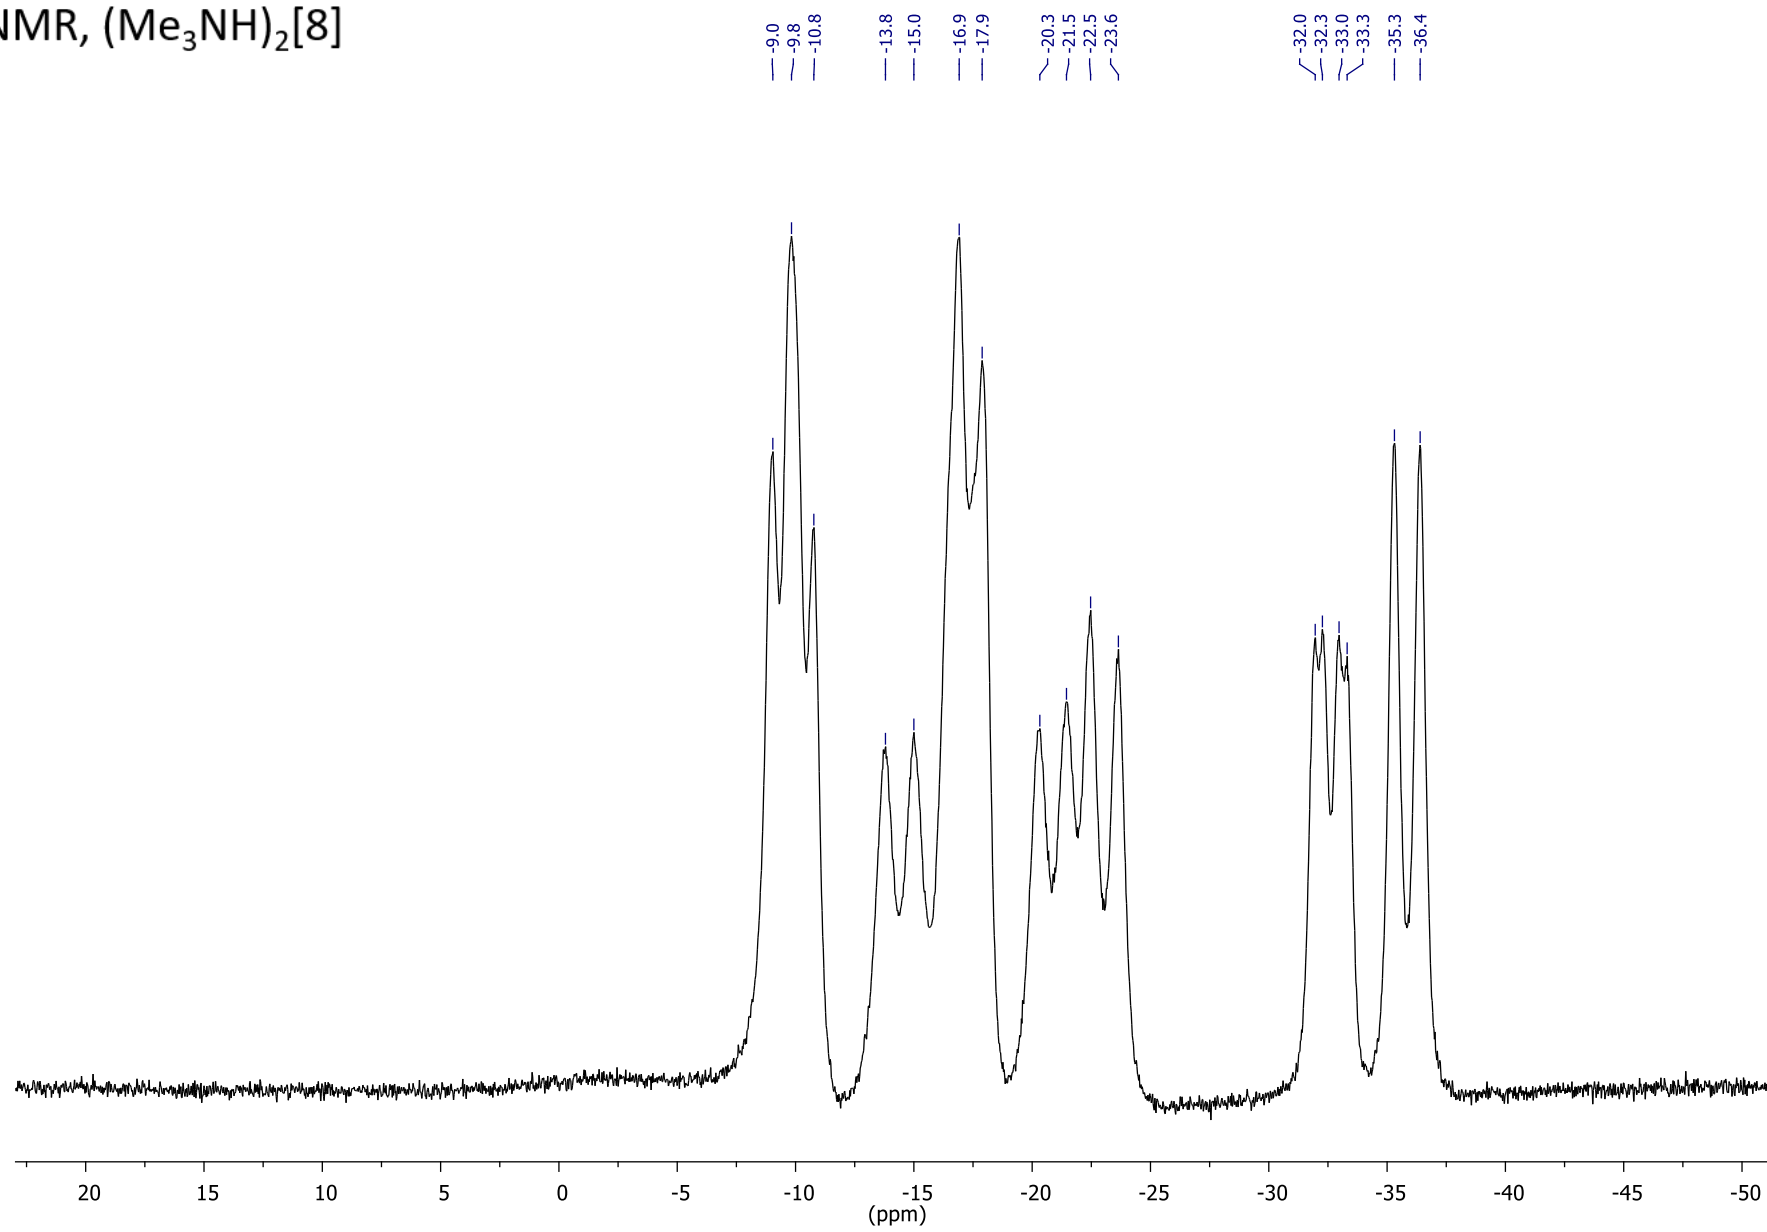

$^{13}\text{C}\{^1\text{H}\}$  NMR,  $(\text{Me}_3\text{NH})_2[8]$

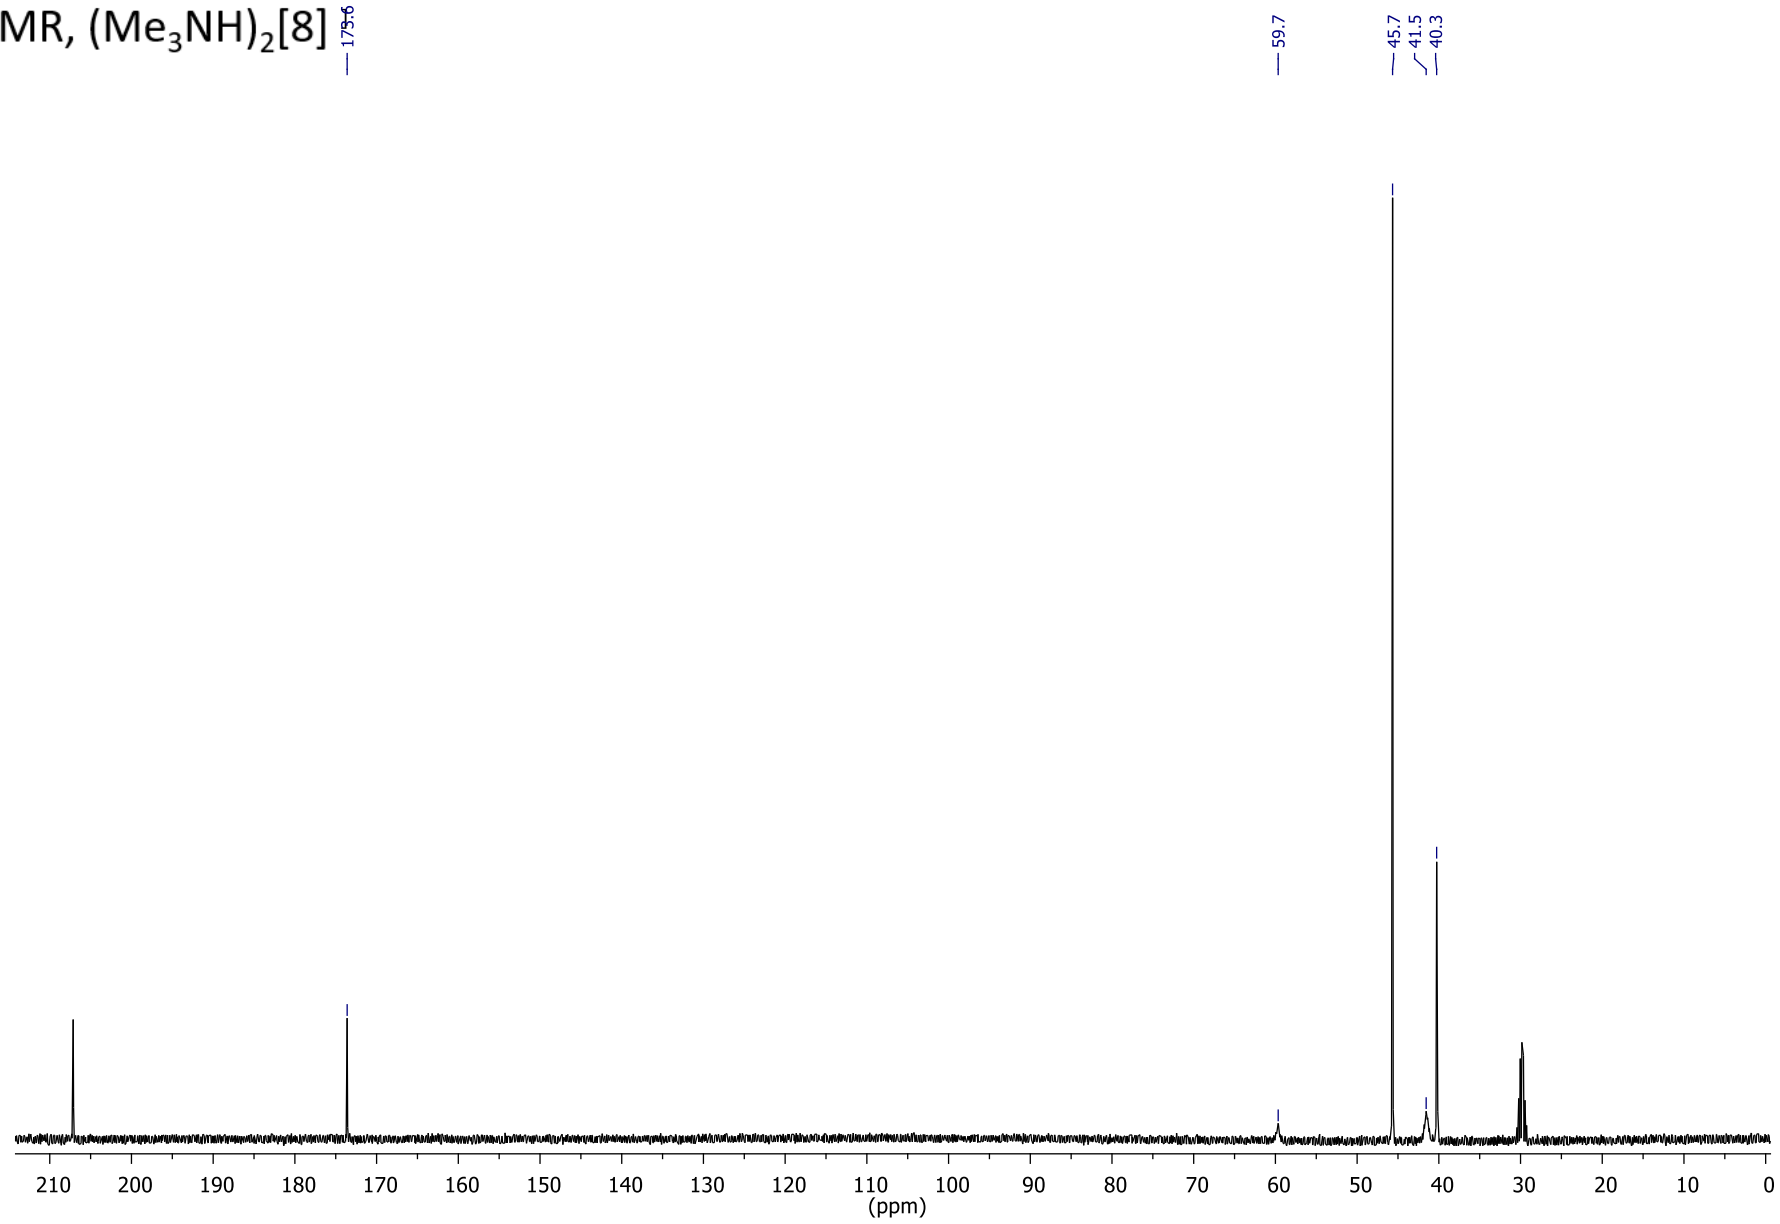

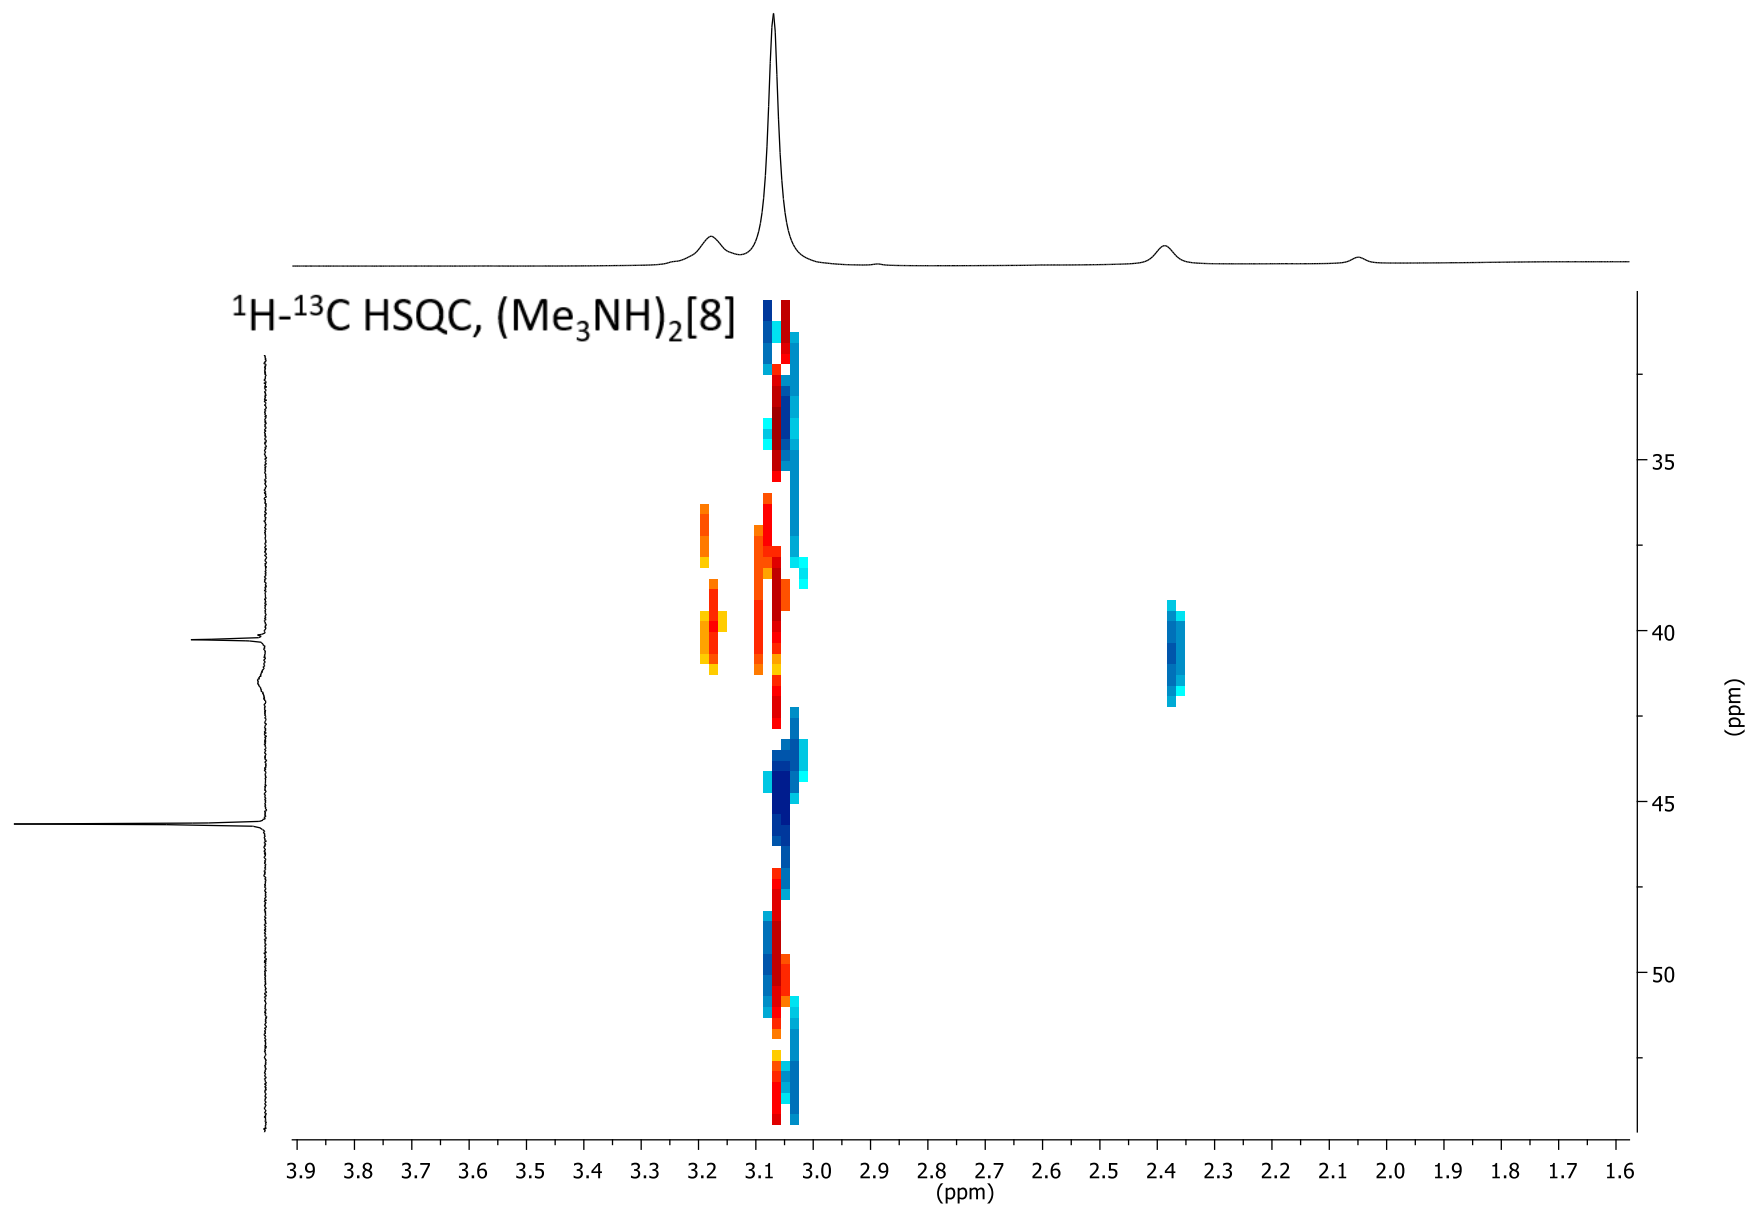

$^1\text{H}$  NMR,  $(\text{Me}_3\text{NH})_2[9]$

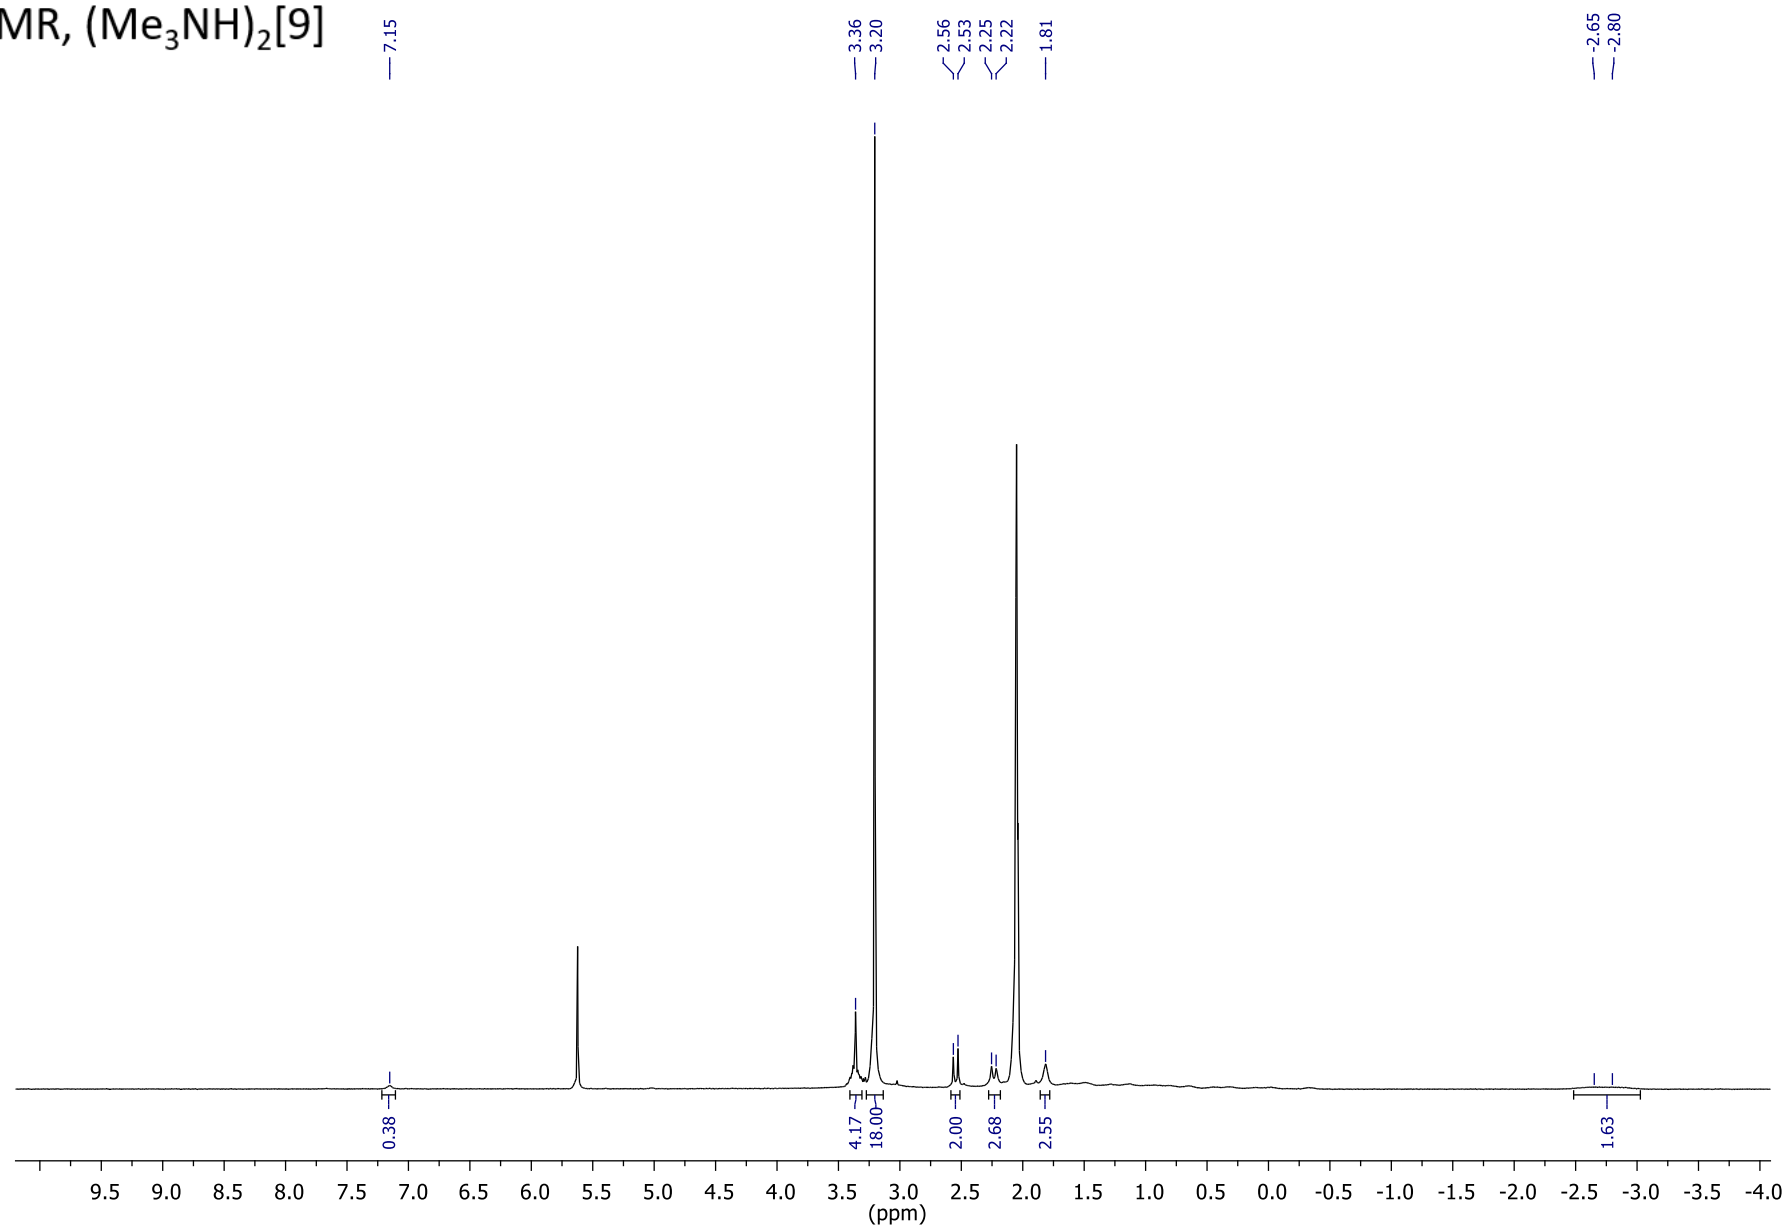

$^{11}\text{B}\{^1\text{H}\}$  NMR,  $(\text{Me}_3\text{NH})_2[9]$

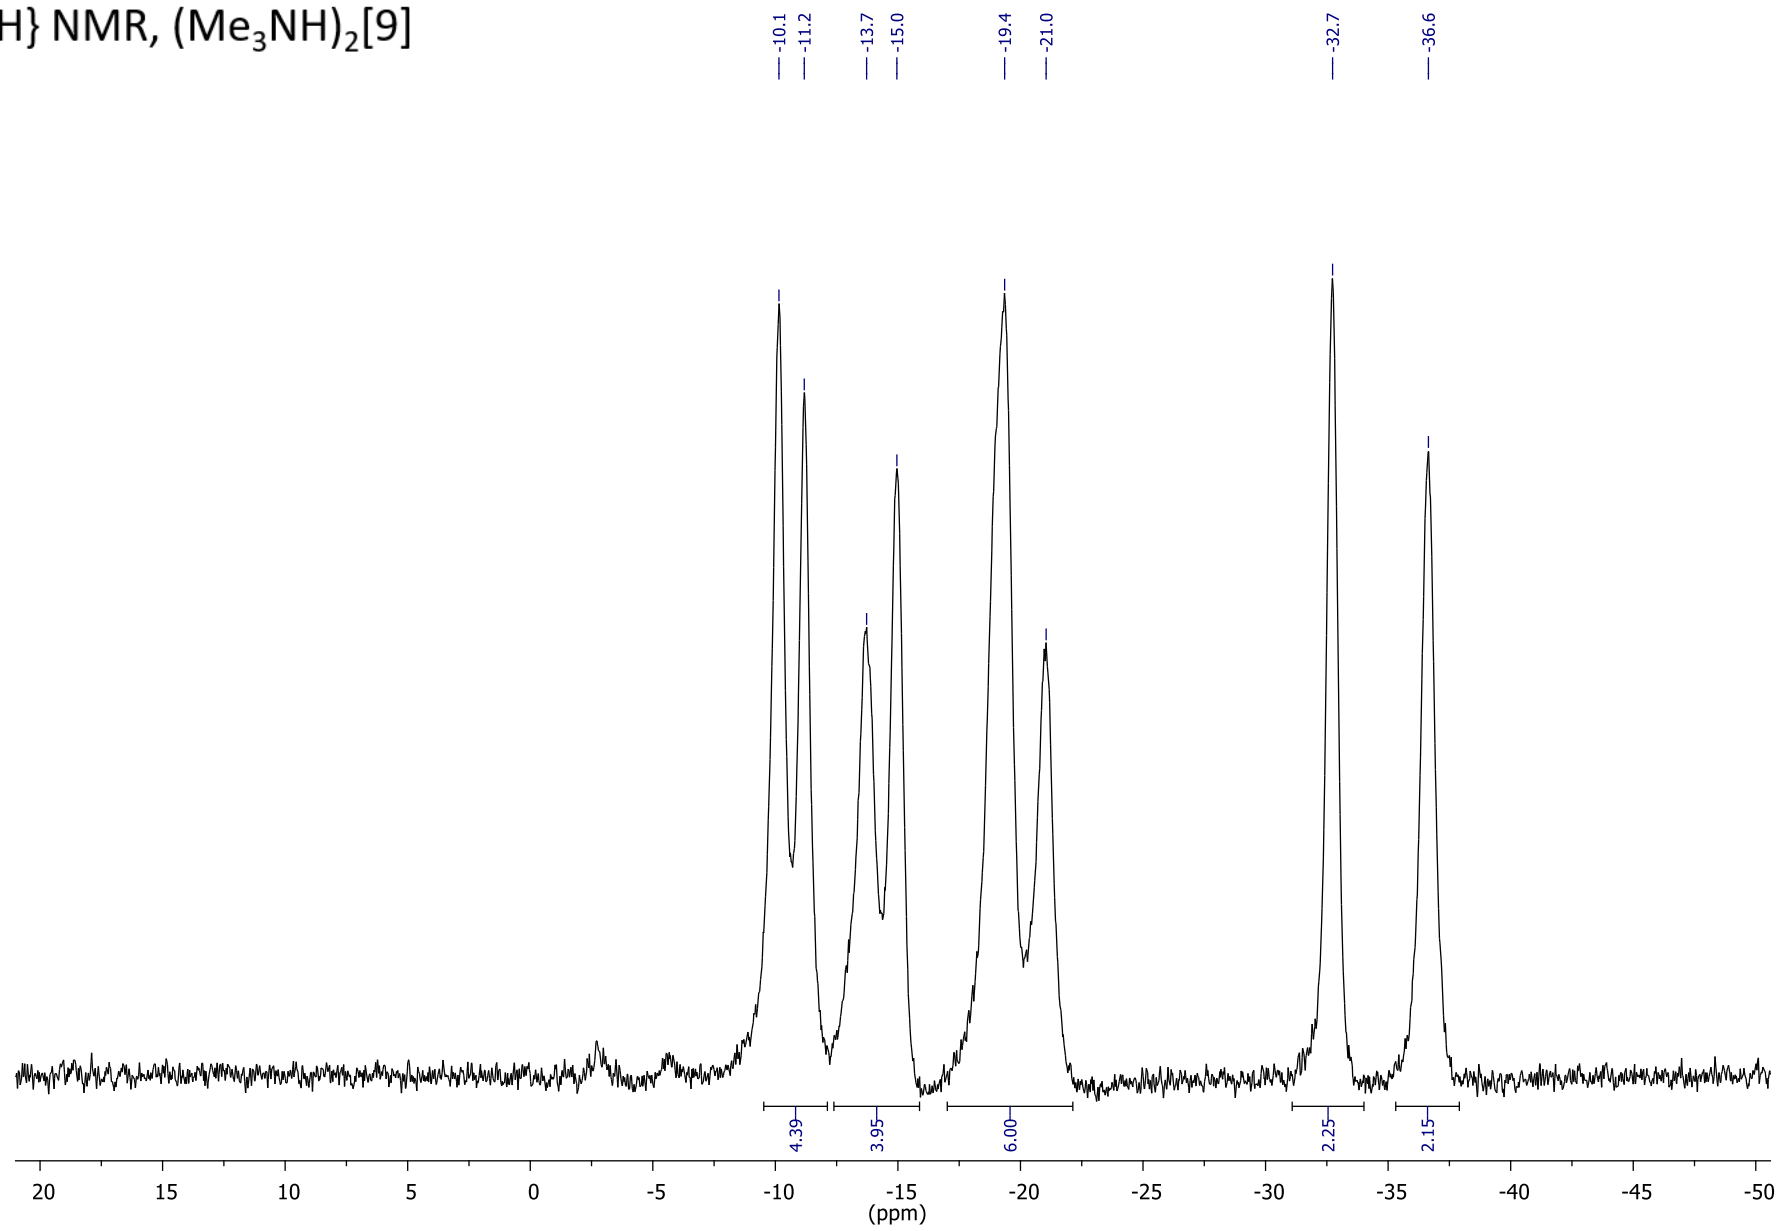



$^{11}\text{B}$  NMR,  $(\text{Me}_3\text{NH})_2[9]$

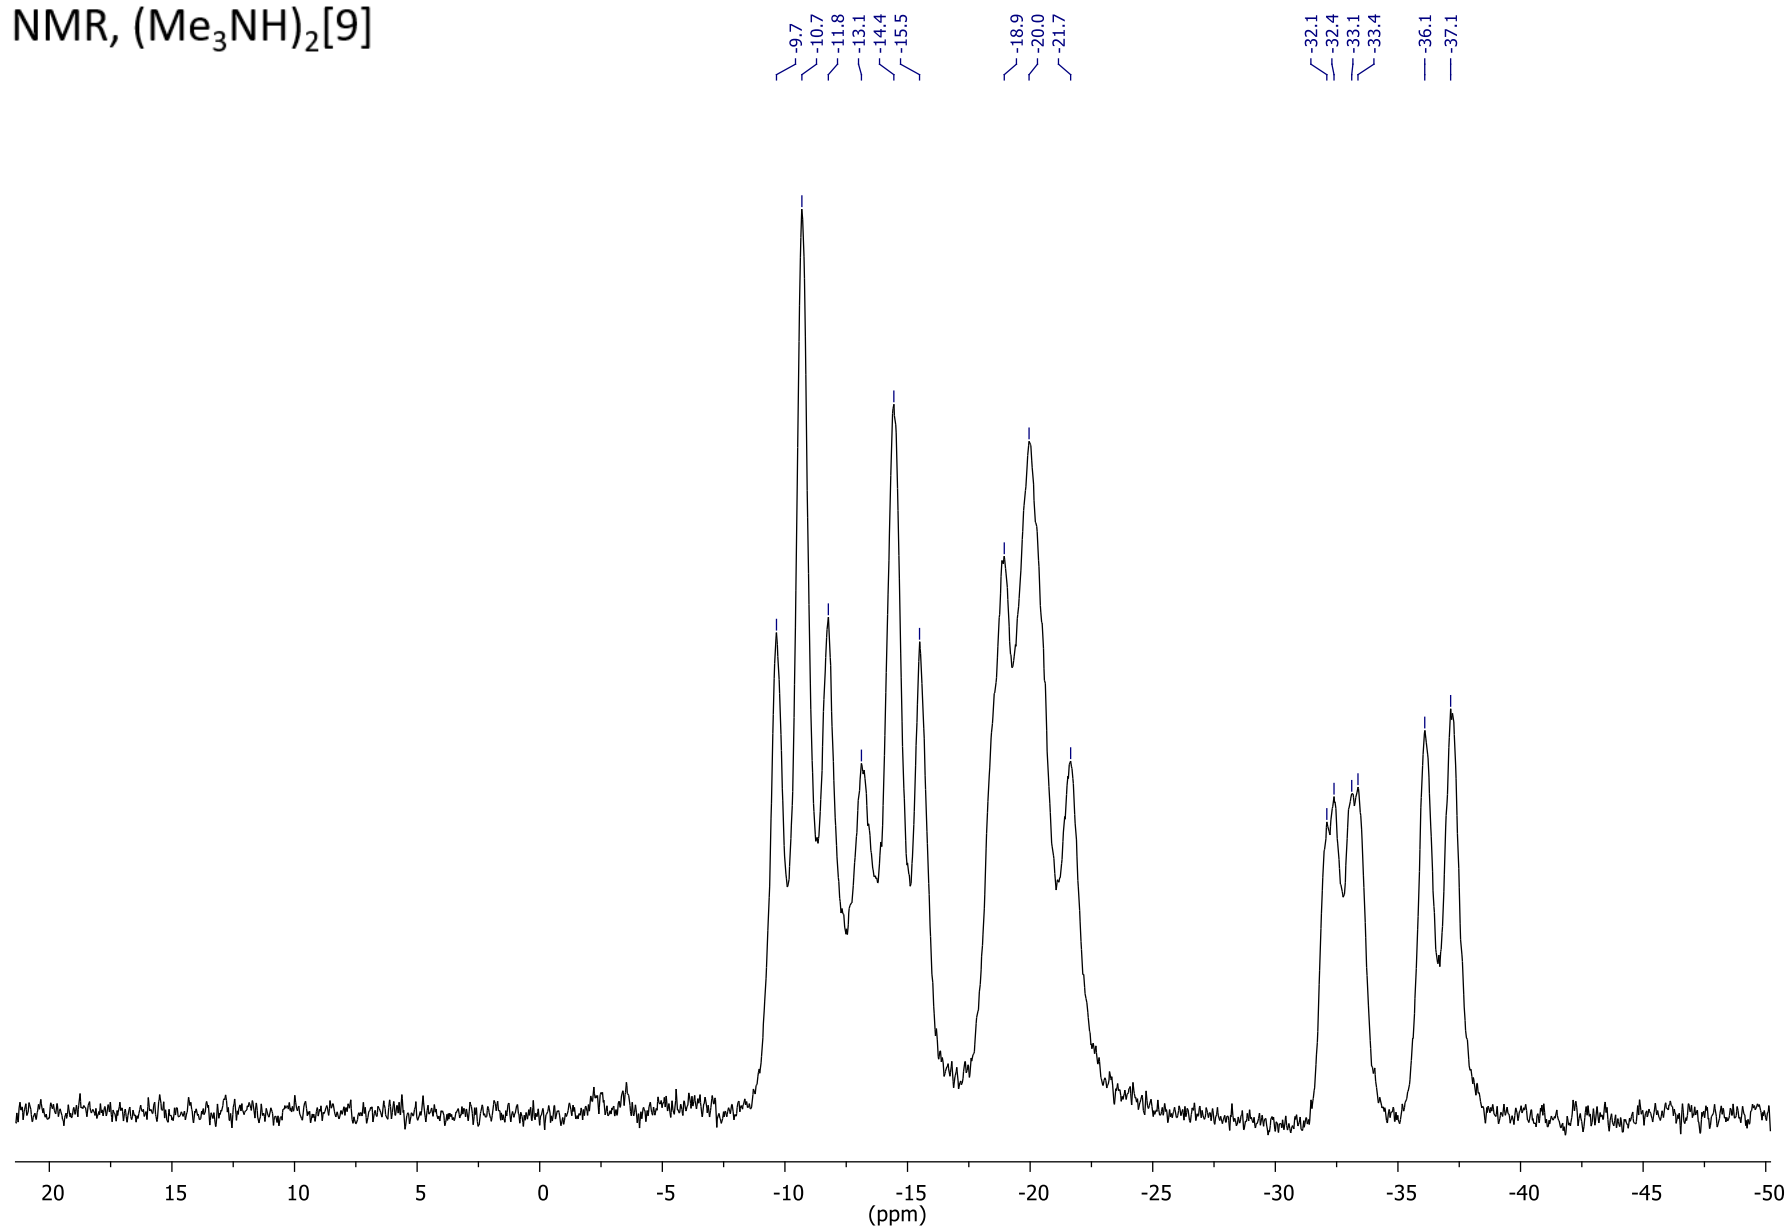

$^1\text{H}$  NMR,  $\text{Cs}_2[9]$

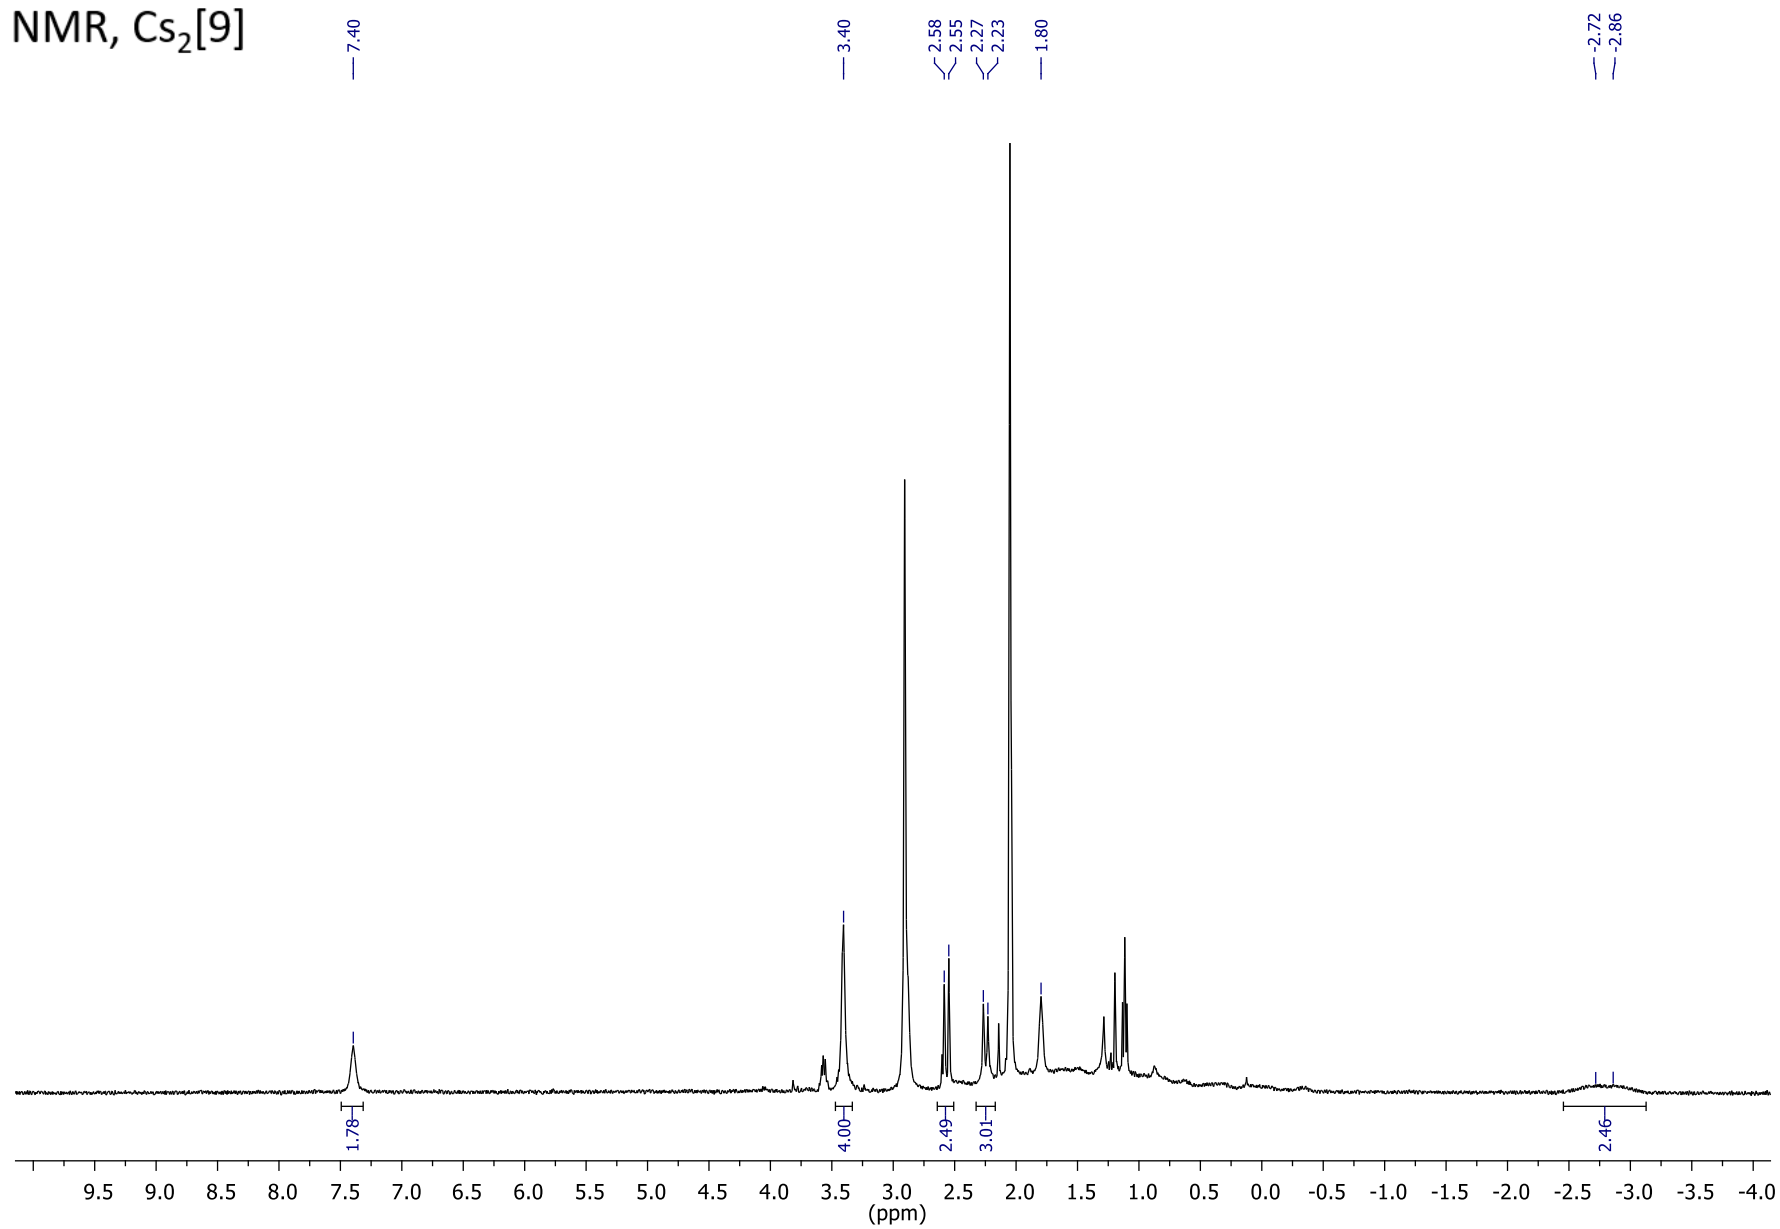

$^{11}\text{B}\{^1\text{H}\}$  NMR,  $\text{Cs}_2[9]$

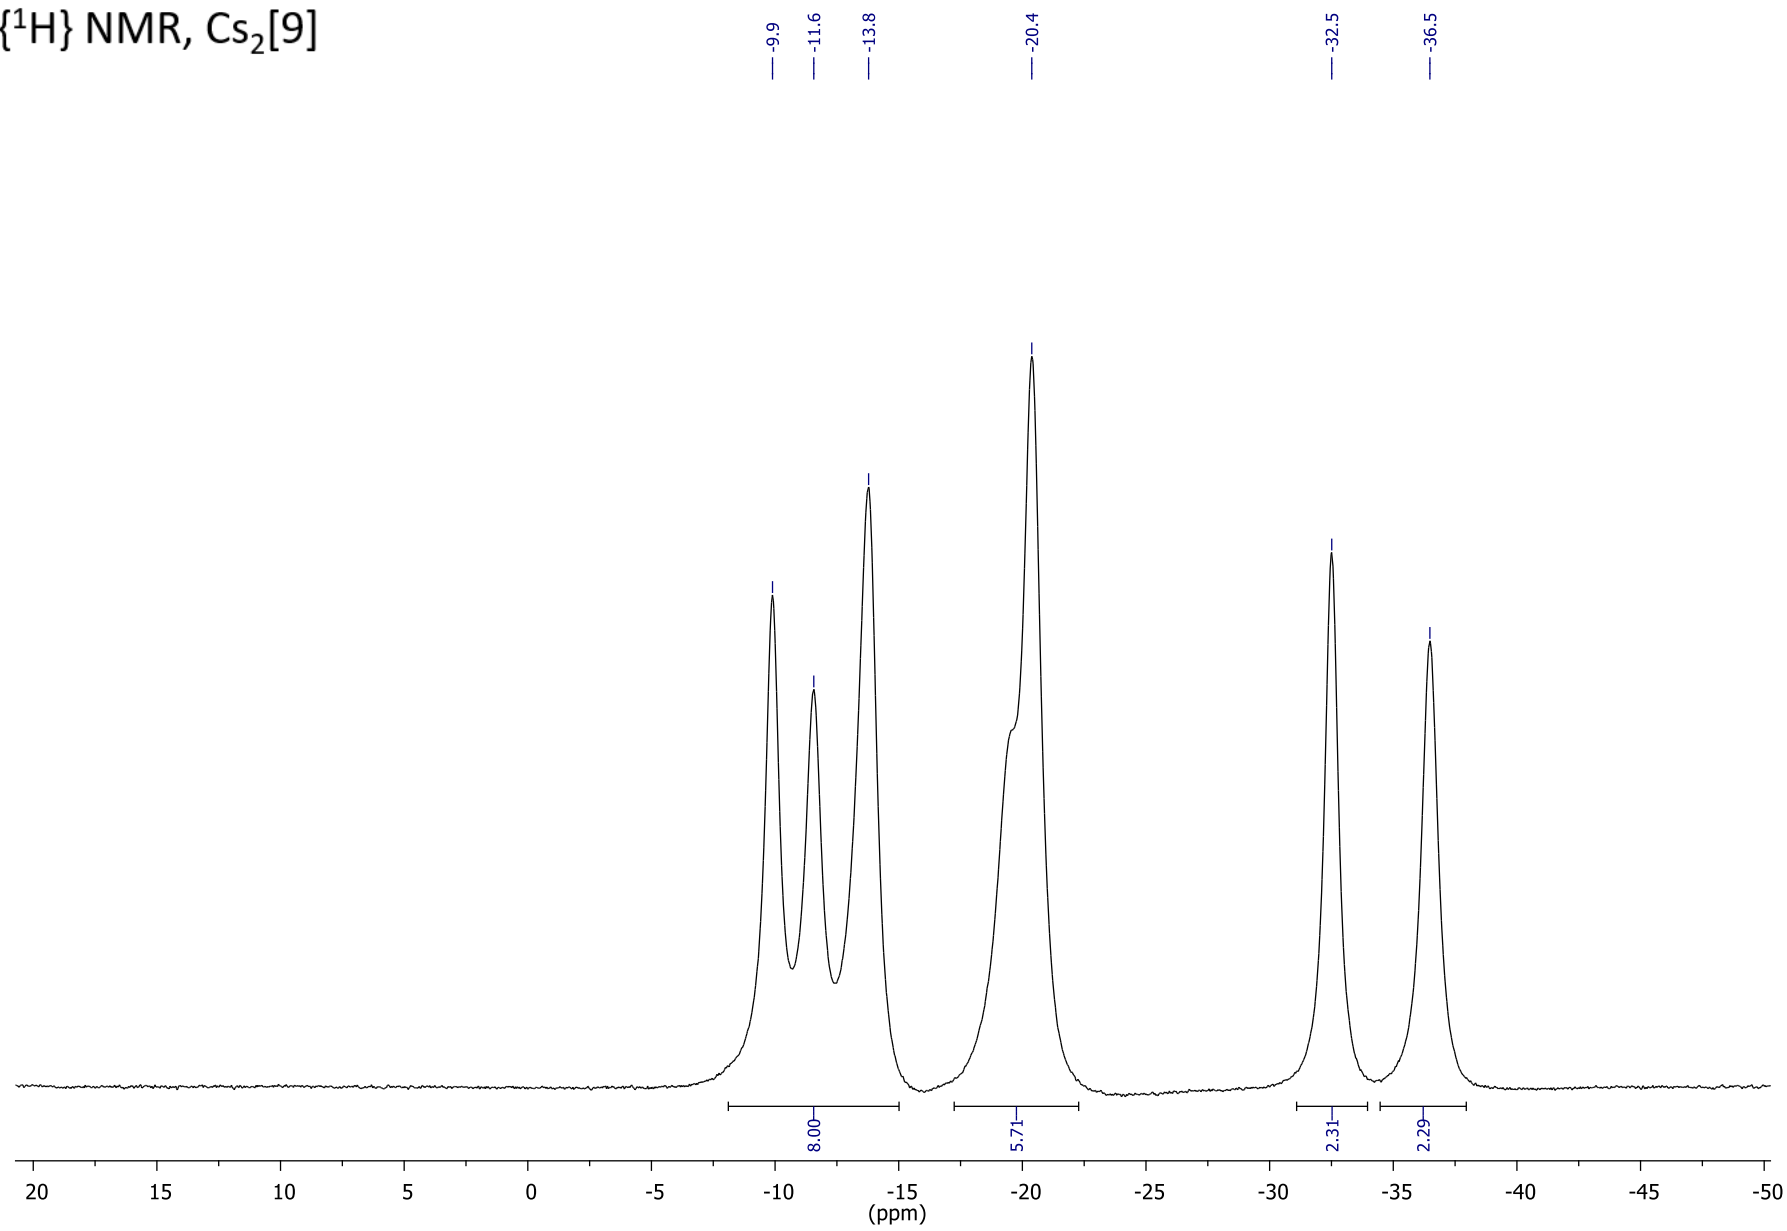

$^{11}\text{B}$  NMR,  $\text{Cs}_2[9]$

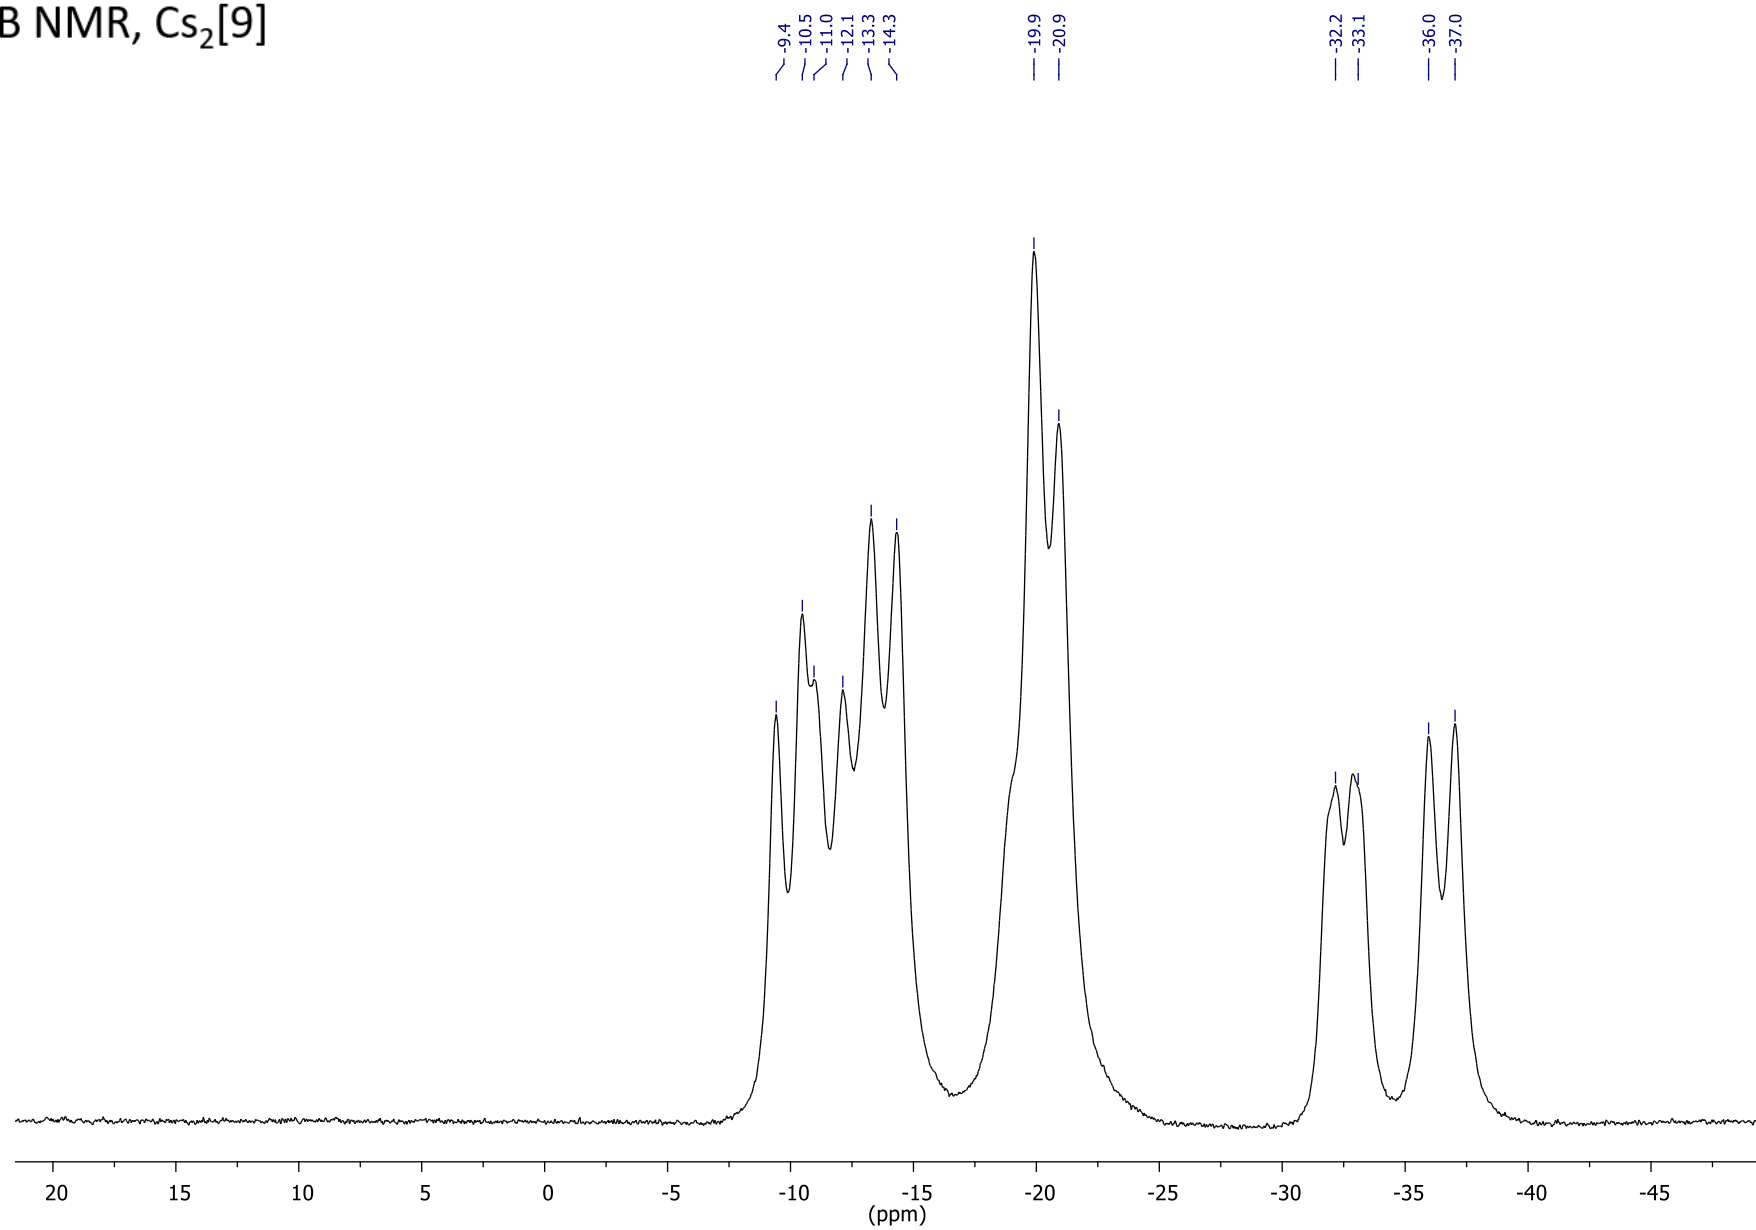

Table S1. Selected geometry characteristics (distance in Å, angles in deg.) of compound **5** as obtained from X-ray study and quantum chemical calculation.

| Angle or contact | X-ray     | Calculation |
|------------------|-----------|-------------|
| C2-C1-C3-N1      | 166.3(2)  | -177.5      |
| C1-C3-N1-C4      | 179.2(2)  | -174.6      |
| C3-N1-C4-C4'     | -117.7(2) | -86.3       |
| N1-C4-C4'-N1'    | 63.6(2)   | 68.6        |
| C3'-N1'C4'-C4    | -119.6(2) | 176.3       |
| C1'-C3'-N1'-C4'  | 176.4(2)  | -179.9      |
| C2'-C1'-C3'-N1'  | 170.4(2)  | 178.3       |
| B3-H3...H4'-B4'  | 2.60      | 2.86        |
| B4-H4...H3'-B3'  | 2.51      | —           |
| N1-H1...O1'      | intermol. | —           |
| H...O            | 2.09      | —           |
| N...O            | 2.860(2)  | —           |
| <NHO             | 146       | —           |
| N1'-H1'...O1     | intermol. | intramol.   |
| H...O            | 2.12      | 2.06        |
| N...O            | 2.899(2)  | 2.937       |
| <NHO             | 147       | 144         |

Table S2. Energies (relative to the most favored isomer in kcal/mol) and principal geometry of  $[\text{Gd}(\text{C}_2\text{B}_9\text{H}_{11})_2(\text{DME})]^-$  rotamers.

|            | 1     | 2      | 3       | 4       | 5       | 6      | 7       | 8       | 9       |
|------------|-------|--------|---------|---------|---------|--------|---------|---------|---------|
| $\Delta E$ | 13.4  | 5.8    | 3.0     | 6.4     | 5.3     | 0.0    | 3.1     | 7.4     | 3.1     |
| D1         | 27.24 | -14.25 | -15.39  | 13.21   | 30.30   | 165.22 | 179.28  | 87.22   | 165.93  |
| D2         | 8.69  | 125.28 | -164.85 | -127.32 | -152.45 | 163.30 | -145.98 | 125.03  | -125.14 |
| D3         | 35.93 | 111.03 | -180.24 | -114.11 | -122.15 | -31.48 | 33.30   | -147.75 | 40.79   |

D1 = centroid O...O and centroid C-C of first cage:  $\text{cent}_{\text{OO}}\text{-Gd-B}_{\text{ax}}\text{-cent}_{\text{CC}}$  dihedral.

D2 = centroid O...O and centroid C'-C' of second cage:  $\text{cent}_{\text{OO}}\text{-Gd-B}'_{\text{ax}}\text{-cent}_{\text{C}'\text{C}'}$  dihedral.

D3 = sum of D1 and D2.

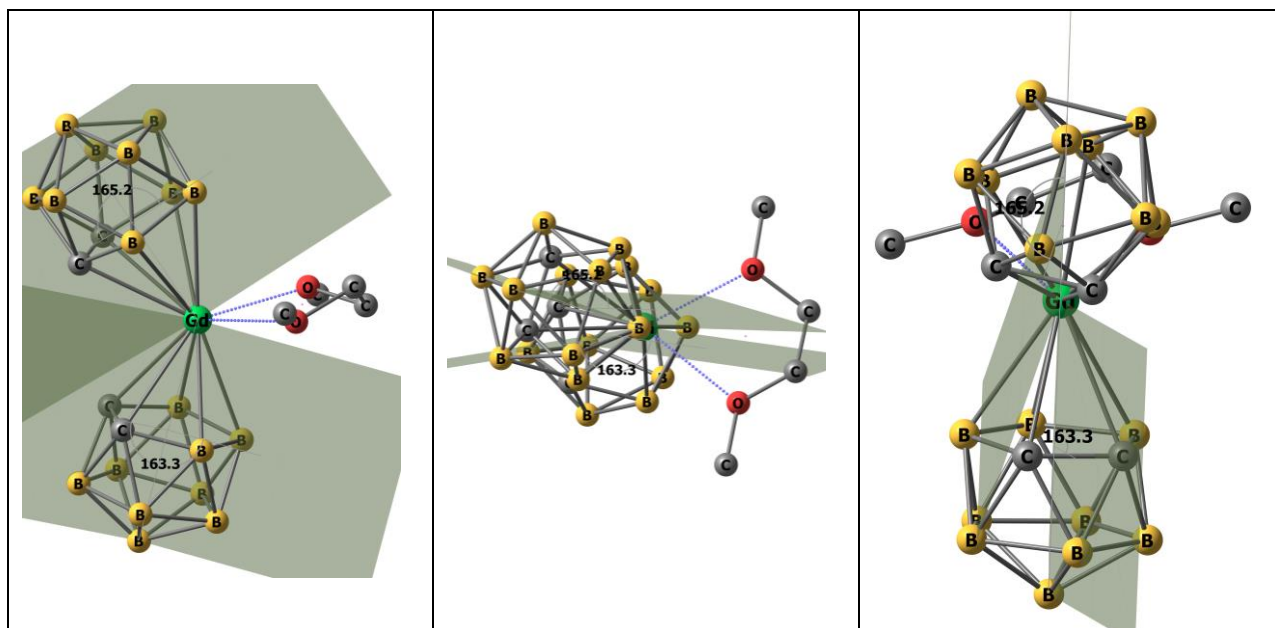

Figure S1. Optimized geometry of the most favored isomer of  $[\text{Gd}(\text{C}_2\text{B}_9\text{H}_{11})_2(\text{DME})]^-$  (three projections). Dihedrals D1 and D2 projected as olive planes, hydrogen atoms omitted for clarity.
